Article

**The bitter end: T2R bitter receptor agonists elevate nuclear calcium and induce apoptosis in non-ciliated airway epithelial cells**

**Running title:** *T2R regulation of nuclear calcium and apoptosis*

Derek B. McMahon,<sup>1\*</sup> Li Eon Kuek,<sup>1</sup> Madeline E. Johnson<sup>1</sup>, Paige O. Johnson<sup>1</sup>, Rachel L.J. Horn<sup>1</sup>, Ryan M. Carey<sup>1</sup>, Nithin D. Adappa,<sup>1</sup> James N. Palmer,<sup>1</sup> and Robert J. Lee<sup>1,2,\*</sup>

<sup>1</sup>Department of Otorhinolaryngology, University of Pennsylvania Perelman School of Medicine, Philadelphia, Pennsylvania, USA

<sup>2</sup>Department of Physiology, University of Pennsylvania Perelman School of Medicine, Philadelphia, Pennsylvania, USA

\*Correspondence: [derekbm@penmedicine.upenn.edu](mailto:derekbm@penmedicine.upenn.edu) (D.B.M.) or [rjl@penmedicine.upenn.edu](mailto:rjl@penmedicine.upenn.edu) (R.J.L).

**KEYWORDS:** G protein-coupled receptor (GPCR), mucosal immunology, cyclic-AMP, caspase, bacterial infection, chronic rhinosinusitis, chemosensation, nitric oxide, cystic fibrosis,

*Pseudomonas aeruginosa*

## **Abstract**

Bitter taste receptors (T2Rs) localize to airway motile cilia and initiate innate immune responses in retaliation to bacterial quorum sensing molecules (acyl-homoserine lactones and quinolones). Activation of T2Rs leads to calcium-driven NO production that increases cilia beating and directly kills bacteria. Several airway diseases, including chronic rhinosinusitis, COPD, and cystic fibrosis, are characterized by epithelial remodeling, including loss of motile cilia and/or squamous metaplasia. To understand the function of T2Rs within the altered landscape of airway disease, we studied T2Rs in non-ciliated airway cell lines and primary cells de-differentiated to a squamous phenotype. In differentiated cells, T2Rs localize to cilia, however in de-differentiated, non-ciliated cells they localize to the nucleus. Cilia and nuclear import utilize many shared proteins, thus in the absence of motile cilia some T2Rs may target to the nucleus. T2R agonists selectively elevated both nuclear and mitochondrial calcium through a G-protein-coupled receptor, phospholipase C, and InsP<sub>3</sub> receptor-dependent mechanism. Additionally, T2R agonists decreased nuclear cAMP, increased nitric oxide, and increased cGMP, consistent with T2R signaling. Furthermore, exposure to T2R agonists led to nuclear calcium-induced mitochondrial depolarization and caspase activation. T2R agonists induced apoptosis in primary bronchial and nasal cells differentiated at air-liquid interface but then induced to a squamous phenotype by apical submersion. Air-exposed well-differentiated cells did not die. This T2R-induced apoptosis may be a last-resort defense against infection, possibly when bacteria have breached the epithelial barrier and reach non-ciliated cells below. However, it may also increase susceptibility of de-differentiated or remodeled epithelia to damage by bacterial metabolites. Moreover, the T2R-activated apoptosis pathway occurs in airway cancer cells. T2Rs may thus contribute to microbiome-tumor cell crosstalk in airway cancers. T2R agonists may also be useful topical therapeutics (e.g., delivered by nasal rinse or nebulizer) for activating airway cancer cell apoptosis without killing surrounding differentiated tissue.

## Introduction

Motile cilia defend the airways. Pathogens get trapped in airway mucus and motile cilia drive their clearance toward the oropharynx for swallowing [1]. Motile cilia are also immune sensors [2]. Cilia contain bitter taste receptors (T2Rs), G protein-coupled receptors (GPCRs) originally identified on the tongue which also detect bacterial N-acylhomoserine lactones and quinolones [3-5]. T2R isoforms 4, 14, 16, and 38, are in human nasal [3, 6] and bronchial [7] cilia. Cilia T2Rs initiate  $Ca^{2+}$ -triggered nitric oxide (NO) production to increase ciliary beating via cGMP and protein kinase G [3, 5]. NO also damages cell walls and DNA of bacteria [8] and inhibits replication of viruses [9], including SARS-COV-1 and -2 [10, 11].

Clinical data support importance of ciliated cell T2Rs in chronic rhinosinusitis (CRS) [1]. Patients with polymorphisms that render the cilia-localized T2R38 isoform non-functional are at higher risk of CRS, are more likely to require sinus surgery, and may have poorer outcomes after surgery [5]. We hypothesize that pathologies resulting in cilia loss or airway remodeling may impair the T2R pathway and have detrimental effects on innate immunity.

Several airway diseases share phenotypes of acquired cilia defects or loss of cilia due to squamous metaplasia or other inflammatory remodeling, including CRS [1], chronic obstructive pulmonary disease (COPD) [12, 13], and cystic fibrosis (CF) [14]. Loss of cilia occurs with viral or bacterial infection [2], type-2 inflammation-driven remodeling [15], or smoking [16]. Elucidating how T2R signaling changes as the airway epithelium changes is required to understand airway pathophysiology.

We studied how T2R signaling changes when ciliated cells are de-differentiated or replaced with squamous cells in airway disease. We used airway cell lines as well as primary nasal and bronchial cells. While squamous epithelial cells still express T2Rs, altered intracellular localization of T2R-induced  $Ca^{2+}$  responses, and possibly the T2Rs themselves,

*T2R regulation of nuclear calcium and apoptosis*

contributes to activation of alternative apoptotic signaling involving  $\text{Ca}^{2+}$  signaling from the nucleus to mitochondria.

## **Materials and Methods**

All reagents are shown in **Supplementary Table S1**. More detailed methods are in

### **Supplementary Material.**

#### **Human primary cell culture**

Primary sinonasal culture was carried out as described [6, 17]. Institutional review board approval (#800614) and written informed consent was obtained. Tissue was collected from patients  $\geq 18$  years of age undergoing surgery for sinonasal disease or trans-nasal approaches to the skull base. Primary cells were obtained through dissociation (1.4 mg/ml pronase; 0.1 mg/ml DNase; 1 hour; 37°C) [3]. Primary normal human bronchial (HBE) cells were from Lonza (Walkerville, MD) cultured in PneumaCult (Stemcell Technologies) plus penicillin/streptomycin. Immortalization with BMI-1 (indicated for some experiments) was carried out as in [18]. For deciliation, (HBE) air liquid interface (ALI) cultures were differentiated for 3 weeks and then either exposed to air or apical submersion for 4 days [17]. Age-matched cultures were compared. *TAS2R38* genotyping was previously described [3].

#### **Cell line culture**

Cell culture was as described [6, 17] in Minimal Essential Media with Earl's salts (Gibco; Gaithersburg, MD USA) plus 10% FBS and 1% penicillin/streptomycin (Gibco). RPMI 2650 (nasal squamous carcinoma), BEAS-2B (adenovirus 12-SV40 hybrid immortalized bronchial), A549 (alveolar type II-like carcinoma), HEK293T, NCI-H292 (lung mucoepidermoid carcinoma expressing T2R14 [19]), and Caco-2 (colorectal adenocarcinoma) cells were from ATCC (Manassas, VA USA). 16HBE (SV-40 immortalized bronchial) cells [20] were from D. Gruenert (University of California San Francisco, San Francisco, CA USA). Transfections used Lipofectamine 3000 (ThermoFisher Scientific, Waltham MA). After transfection with shRNA plasmids for either T2R8, T2R10, T2R14, or scramble shRNA for stable expression, Beas2B

cells were supplemented with 1 µg/mL puromycin for 1 week and then maintained in 0.2 µg/mL puromycin.

### **Live Cell Imaging**

Unless noted, imaging was as described [6, 17]. For Ca<sup>2+</sup>, cells were loaded with 5 µM Fura-2-AM or Fluo-8-AM for 1 hour in HEPES-buffered Hank's Balanced Salt Solution (HBSS) at room temperature in the dark. Cells were loaded with 10 µM DAF-FM diacetate for 1.5 hours. Fura-2 was imaged using an Olympus IX-83 microscope (20x 0.75 NA objective), fluorescence xenon lamp with excitation and emission filter wheels (Sutter Instruments, Novato, CA USA), Orca Flash 4.0 sCMOS camera (Hamamatsu, Tokyo, Japan) and MetaFluor (Molecular Devices, Sunnyvale, CA USA) using a Fura-2 filters (79002-ET, Chroma, Rockingham, VT USA). Imaging of Fluo-8 or DAF-FM used a FITC filter set (49002-ET, Chroma). For nuclear Ca<sup>2+</sup> or cAMP, plasmids for G-GECO, R-GECO-nls, Flamindo2 or nls-Flamindo2 were transfected 48 hours prior to imaging. Images were taken with FITC or TRITC filters. Annexin V-FITC was imaged at 10x (0.4 NA).

### **Proliferation, Mitochondrial Membrane Potential, and Apoptosis Measurements**

XTT was added to sub-confluent cells immediately before absorbance measurements at 475nm (specific absorbance) and 660nm (reference) with Spark 10M plate reader (Tecan; Männedorf, Switzerland). JC-1 dye was added 10 min prior to recording (ex.488/em.535 and em.590) while CellEvent Caspase 3/7 (ThermoFisher) was added immediately prior to recording (ex.495/em.540).

### **Immunofluorescence**

Cultures were fixed (4% paraformaldehyde, 20 min) followed by incubation in phosphate saline buffer containing 5% normal donkey serum, 1% bovine serum albumen, 0.2% saponin, and 0.1% Triton X-100 for 45 min. Cultures were incubated 1:100 dilutions of T2R or α-gustducin antibodies at 4°C overnight, then AlexaFluor-labeled donkey anti-mouse or anti-rabbit (1:1000) at 4°C for 1 hour. Images were taken on using 60x objective (1.4 NA oil). MitoTracker Deep

Red FM was used at 10 nM for 15 min. Co-staining of T2R14 and T2R38 used AlexaFluor 488 and 546 Zenon antibody labeling kits.

### **Biochemistry**

For endogenous T2Rs, cells were lysed and run on a NuPage 4-12% Bis-Tris gel, transferred to nitrocellulose, then blocked in 5% milk in 50 mM Tris, 150 mM NaCl, and 0.025% Tween-20 (Tris-Tween) for 1 hour. Primary antibody (1:1000) in Tris-Tween with 5% BSA for 1.5 hours. Goat anti-rabbit or anti-mouse IgG-horseradish peroxidase secondary antibodies (1:5000) for 1 hour. Blots were visualized with Clarity ECL on an imager with Image Lab Software (BioRad). Nuclei were isolated using the REAP method [21] then either used for biochemistry or fixed on slides.

### **Quantitative PCR (qPCR)**

Subconfluent cultures were resuspended in TRIzol (ThermoFisher Scientific). Purified RNA (Direct-zol RNA kit; Zymo Research) was transcribed to cDNA via High-Capacity cDNA RT Kit (ThermoFisher Scientific). Taqman Q-PCR probes were used in a QuantStudio 5 Real-Time PCR System (ThermoFisher Scientific).

### **Data analysis and statistics**

T-tests (two comparisons only) and one-way ANOVA (>2 comparisons) were calculated using GraphPad PRISM with appropriate post-tests. In all figures,  $p < 0.05$  (\*),  $p < 0.01$  (\*\*),  $p < 0.001$  (\*\*\*).

## Results

### Bitterants regulate $\text{Ca}^{2+}_{\text{nuc}}$

We examined bitter agonist (bitterant)-induced intracellular  $\text{Ca}^{2+}$  ( $\text{Ca}^{2+}_{\text{i}}$ ) release in primary human bronchial epithelial (HBE) cells grown in submersion to model non-ciliated squamous basal cells [22] as well as non-ciliated bronchial epithelial lines, including viral-immortalized Beas-2B [23] and 16HBE14o- (16HBE) [20] and cancer-derived A549 and RPMI 2650 cells. T2R agonists diphenhydramine (DPD), flufenamic acid (FFA), and denatonium benzoate all induced  $\text{Ca}^{2+}_{\text{i}}$  release in these non-ciliated airway cells (**Supplementary Fig. S1**) and T2R expression was observed (**Supplementary Fig. S2**). Cognate T2Rs for agonists used are in **Table S2**. T2R agonist-induced  $\text{Ca}^{2+}_{\text{i}}$  appeared most intense in the nucleus of airway (**Fig. 1A**, **Supplementary Fig. S3-S5**) and non-airway Caco-2 cells (**Figure S6**). Other GPCRs elicited more global  $\text{Ca}^{2+}_{\text{i}}$  responses (**Supplementary Fig. S2, S4**). We saw similar bitterant-induced nuclear  $\text{Ca}^{2+}_{\text{i}}$  in primary nasal cells from turbinate brushing cultured in submersion (**Supplementary Fig. S7**).

To directly investigate if bitterants elevate nuclear  $\text{Ca}^{2+}$  ( $\text{Ca}^{2+}_{\text{nuc}}$ ), Beas-2Bs were co-transfected with genetically-encoded  $\text{Ca}^{2+}$  biosensors: green (G)-GECO and red (R)-GECO-nls [24] to differentiate between global  $\text{Ca}^{2+}_{\text{i}}$  and  $\text{Ca}^{2+}_{\text{nuc}}$ . Denatonium benzoate increased R-GECO-nls more than G-GECO fluorescence (**Fig. 1B**) suggesting T2Rs preferentially increase  $\text{Ca}^{2+}_{\text{nuc}}$ . In contrast, histamine elevated both similarly, (**Fig. 1B**).  $\text{Ca}^{2+}_{\text{nuc}}$  also increased in A549s, RPMI2650s, and submerged primary nasal cells from 3 patients in response to bitterants (**Supplementary Fig. S7-S8**). *Pseudomonas aeruginosa* 3-oxo-C12-HSL activates multiple T2Rs [4, 5]; 50  $\mu\text{M}$  3-oxo-C12-HSL activated both  $\text{Ca}^{2+}_{\text{i}}$  (Fluo-8) and  $\text{Ca}^{2+}_{\text{nuc}}$  (R-GECO-nls) in Beas-2Bs (**Fig. 1C-E**). Together, these results demonstrate the novel finding that diverse T2R agonists specifically elevate  $\text{Ca}^{2+}_{\text{nuc}}$ . Although the cells lack cilia, the T2Rs nonetheless are functional.



We utilized a protocol to permeabilize plasma membrane but not intracellular organelles, previously used to study ER  $\text{Ca}^{2+}$  release [25]. In permeabilized A549s, quinine still increased  $\text{Ca}^{2+}_{\text{nuc}}$  (**Fig. S9**), suggesting  $\text{Ca}^{2+}_{\text{nuc}}$  originates from T2R signaling on intracellular membranes. In Beas-2Bs,  $\text{Ca}^{2+}_{\text{nuc}}$  was slightly reduced but still intact with 0- $\text{Ca}^{2+}_{\text{o}}$  (no added  $\text{Ca}^{2+}$  plus 2 mM EGTA) buffer but fully eliminated when cells were preloaded with  $\text{Ca}^{2+}$  chelator BAPTA (**Fig. 1F**). Thus, T2R-induced  $\text{Ca}^{2+}_{\text{nuc}}$  originates largely from internal  $\text{Ca}^{2+}$  stores, supported by an ER-localized  $\text{Ca}^{2+}$  biosensor (**Fig. S10**).

Denatonium benzoate activates ~8 T2Rs, while sodium benzoate activates only 2 with weak affinity [26] (**Table S2**). Denatonium benzoate activated  $\text{Ca}^{2+}_{\text{nuc}}$  while equimolar sodium benzoate did not (**Supplementary Fig. S11**). Thus,  $\text{Ca}^{2+}_{\text{nuc}}$  is not due to osmolarity or pH. To confirm GPCR involvement, broad-range G protein inhibitor YM-254890 [27] or phospholipase C (PLC) inhibitor U73122 blocked both  $\text{Ca}^{2+}_{\text{i}}$  and  $\text{Ca}^{2+}_{\text{nuc}}$  (**Fig. 1G-J**). T2R10 or T2R14 shRNAs also reduced  $\text{Ca}^{2+}_{\text{nuc}}$  responses to denatonium benzoate (T2R10 agonist) or FFA (T2R14 agonist), respectively (**Fig. 1K**). T2R GPCR signaling is thus responsible for bitterant-induced  $\text{Ca}^{2+}_{\text{nuc}}$ .

HEK293Ts are often used as model for T2R expression [6, 26]. However, a recent study suggested expression of endogenous T2R14 in HEK293Ts [28]. DPD, which activates T2R14, increased  $\text{Ca}^{2+}_{\text{nuc}}$  in HEK293Ts (**Supplementary Fig. S12A-B**). HEK's express a several T2Rs by qPCR (**Supplementary Fig. S12C**), and a *TAS2R14* promoter GFP reporter revealed bright GFP fluorescence (**Supplementary Fig. S12D**). Staining of HEK293Ts with two different T2R14 antibodies was plasma membrane localized at cell-cell contact points but also partly nuclear (**Supplementary Fig. S12E**). Thus, However, T2R elevation of  $\text{Ca}^{2+}_{\text{nuc}}$  may have implications in many cell types and caution should be exercised with HEK's as a model for T2R expression.

### **Bitterants regulate $\text{cAMP}_{\text{nuc}}$**

T2Rs can signal through  $G\alpha$ -gustducin [5] or  $G\alpha_i$  [29] to lower cAMP. T2R signaling in ciliated cells is gustducin-independent [3], but nonetheless decreases cAMP [5]. To assess changes nuclear cAMP (cAMP<sub>nuc</sub>), we used cAMP biosensor Flamindo2 and nls-Flamindo2 [30]. T2R agonist diphenidol decreased global intracellular cAMP in Beas-2Bs (**Fig. 2A**). Diphenidol and quinine both decreased cAMP<sub>nuc</sub> concomitant with increasing Ca<sup>2+</sup><sub>nuc</sub> (**Fig. 2B-D**). It remains to be determined if this requires gustducin or a  $G\alpha_i$ . However, over expression of Wt gustducin reduced Ca<sup>2+</sup><sub>nuc</sub> by >50%, while non-functional gustducin had no effect (**Fig. 2E**). There may be partial coupling of  $G\alpha_q$  to T2Rs; competing away  $G\alpha_q$  with gustducin may lower Ca<sup>2+</sup> responses. Many GPCRs are G protein promiscuous [31]. Nonetheless, the effects of overexpressing functional gustducin supports T2R involvement.

### **Bitterants regulate NO production**

T2Rs in differentiated ciliated cells produce NO downstream of Ca<sup>2+</sup> via endothelial nitric oxide synthase (eNOS) [3, 6]. Both FFA and denatonium benzoate, but not sodium benzoate, increased DAF-FM (NO indicator dye) fluorescence in 16HBEs that was reduced by NO scavenger cPTIO (**Fig. 3A-B**) or NOS inhibitor L-NAME (**Fig. 3C-D**). GENIE cGMP biosensor showed cGMP increases with FFA and denatonium benzoate (**Fig. 3E-H**). Thus, the T2R Ca<sup>2+</sup> response, even though nuclear, can still increase NO/cGMP. Pretreatment with L-NAME did not alter Fluo-8 responses (**Fig. 3I**), suggesting the NO is downstream of Ca<sup>2+</sup>.

### **T2R14 and T2R39 localize partially to the nucleus**

Intrigued by strong Ca<sup>2+</sup><sub>nuc</sub> responses and the partial nuclear staining of T2Rs above, we examined T2R localization in airway cells. GPCRs and associated proteins can localize to and function on the outer nuclear membrane or within internal nucleoplasmic reticulum membranes [32, 33]. A previous study reported an altered staining of T2R38 from cilia in normal tissue to nuclear localization in inflamed and de-ciliated CRS tissue [34], though antibody specificity was not verified nor were functional consequences reported. We hypothesized that certain T2Rs may localize to the nucleus or surrounding ER in the absence of proper trafficking to cilia.

Poor trafficking of T2Rs to the cell surface was reported in the context of potential requirement for  $\beta$ 2 adrenergic receptors ( $\beta$ 2ARs) to “chaperone” T2Rs [19]. However, most airway epithelial cells have robust  $\beta$ 2AR expression; cAMP imaging with  $\beta$ 2AR agonists in Beas-2Bs, 16HBEs, NCI-H292s, and A549s (**Supplementary Fig. S13**) suggests results here are not due to lack of  $\beta$ 2ARs.

Immunofluorescence in multiple cells showed nuclear staining for T2R14 (responds to FFA, DPD, and quinine) and T2R39 (responds to denatonium benzoate and quinine) (**Fig. 4A-F**, **Supplementary Fig. S14**). The antibody against T2R14 was previously validated [6]. To test if the T2R39 antibody was specific, CRISPR-Cas9 was used to create a frameshift in TAS2R39 in A549s. No T2R39 staining was observed in these knockout cells, supporting nuclear localization (**Fig. 4B**). We also saw nuclear staining with an antibody against  $\alpha$ -gustducin (**Figure 4A**), though implications are unclear in light of **Fig. 2E** and previous studies suggesting epithelial T2R signaling is gustducin-independent [35].

In contrast, other GPCRs exhibited plasma membrane or cytoplasmic localization while T2R14 was nuclear (**Fig. 4E-F**). Denatonium-responsive T2R4, 8, and 39 are located at least partly to the nucleus via Western (**Supplementary Fig. S15**). The same T2R14 antibody showed T2R14 localization to cilia in differentiated primary nasal epithelial cells (**Fig. 4G**), as described [6]. T2R39 is likewise expressed in differentiated bronchial cilia [7]. Thus, in airway cells without cilia, such as de-differentiated squamous or cancer cells, T2R14 and T2R39 may instead localize at least partly to the nucleus.

Many studies utilize T2R expression constructs containing N-terminal rat somatostatin type 3 receptor (SSTR3) or bovine rhodopsin sequences to enhance plasma membrane localization (e.g., [19, 26]). While these constructs are useful for discovering T2R agonists, we tested localization of expressed T2Rs with minimal tagging (single N-terminal myc). We observed nuclear localization of myc-T2R14 and myc-T2R39, but not myc-T2R10 (**Fig. 4H**).

Coupled with the endogenous differential T2R38 vs T2R14 localization (**Fig. 4E**), there may be different localizations of T2Rs within the same cells and between different cells

(**Supplementary Fig. S15**).

We also expressed either N-terminal or C-terminal GFP fusions. N-terminally tagged GFP-T2R39 co-localized partly with nuclear membrane Lamin-B1, while C-terminally tagged T2R39-GFP appeared less nuclear. C-terminal sequences in mGluR5 are important for nuclear localization [36]. Similar C-terminal sequences may be important for T2R39 and C-terminal GFP may block interactions conferring nuclear localization. GFP-T2R38 did not appear nuclear, suggesting that the nuclear localization of GFP-T2R39 is an effect of the T2R39 sequence and not the N-terminal GFP (**Fig. 4I**). To further test this, we co-expressed either GFP-T2R39 or T2R39-GFP with mCherry-Lamin A in HEK293Ts. Consistent with above, GFP-T2R39 was localized to the membrane of isolated HEK293T nuclei (labeled with mCherry-Lamin A) while T2R39-GFP was not (**Fig. 4J**), supporting a role for C-terminal sequences in T2R39 nuclear localization.

### **Ca<sup>2+</sup><sub>nuc</sub> signals to mitochondria**

What are the consequences of T2R-induced Ca<sup>2+</sup><sub>nuc</sub> in non-ciliated airway cells? In airway smooth muscle cells, T2R agonists induce phosphorylation of p38 MAPK [37], important for both cell survival. Western revealed that DPD, FFA, and denatonium benzoate promoted a 10-25-fold increase in p38 phosphorylation (**Supplementary Fig. S16A-C**). However, buffering Ca<sup>2+</sup> with BAPTA did not block p38 MAPK phosphorylation (**Supplementary Fig. S16D**), suggesting that Ca<sup>2+</sup><sub>i</sub> and p38 MAPK activation are independent.

Mitochondria are in close proximity to nuclei (**Fig. 5A**). Bitterant absinthin activates influx of mitochondrial Ca<sup>2+</sup> (Ca<sup>2+</sup><sub>mito</sub>) [38]. We observed sustained, mitochondrial-reminiscent Ca<sup>2+</sup> elevations in submerged primary nasal cells (**Supplementary Fig. S7**). Thus, we hypothesized that elevation of Ca<sup>2+</sup><sub>nuc</sub> might signal to mitochondria. We expressed mitochondrial-localized Ca<sup>2+</sup> sensor 4mtD3cpv [39] in 16HBEs, Beas-2Bs, or HEKs. 16HBEs treated with thapsigargin

in 0-Ca<sup>2+</sup><sub>o</sub> buffer exhibited increased Ca<sup>2+</sup><sub>mito</sub>, suggesting internal Ca<sup>2+</sup> stores can feed mitochondria (**Fig. 5B**). Denatonium benzoate and FFA also increased Ca<sup>2+</sup><sub>mito</sub> in Beas-2Bs (**Fig. 5C-D**) and 16HBEs (**Fig. 5F**) but not HEK293Ts (**Fig. 5E**), which do not exhibit Ca<sup>2+</sup><sub>i</sub> increases to denatonium. This was blocked by U73122 or IP<sub>3</sub> receptor antagonist Xestospongin C (**Fig. 5G-H**). Thus, bitterants activate Ca<sup>2+</sup><sub>nuc</sub> and Ca<sup>2+</sup><sub>mito</sub> with similar signaling requirements.

### **Ca<sup>2+</sup><sub>nuc</sub> activates cell death**

Overload of Ca<sup>2+</sup><sub>mito</sub> is linked to cell death [40]. Denatonium benzoate, but not sodium benzoate, inhibited XTT reduction (indirect measurement of NADH metabolism; **Fig. 6A**) at concentrations ≥1 mM in A549's (**Fig. 6B,C**). T2R agonist chrysin also impaired XTT reduction (**Fig. 6C**). In 16HBEs and Beas-2Bs, denatonium benzoate and quinine, but not sodium benzoate, reduced mitochondrial potential ( $\Delta\Psi_m$ ), measured by JC-1 (**Fig. 6D-G**). T2R agonists quinine, 3-oxo-C12-HSL, and DPD activated apoptosis, visualized by increased fluorescence of caspase 3/7-sensitive DEVD-based dye CellEvent (**Fig. 6H and I**). Apoptosis-activating concentrations of denatonium (>5 mM; **Fig. 6H**) paralleled concentrations eliciting Ca<sup>2+</sup><sub>nuc</sub> (**Fig. 6J**) and altering  $\Delta\Psi_m$  (**Fig. 6F**). Pre-incubation of Beas-2Bs in 0-Ca<sup>2+</sup> HBSS with 10  $\mu$ M BAPTA ± 15 mM denatonium prevented both  $\Delta\Psi_m$  depolarization (**Fig. 6K**) and caspase activation (**Fig. 6L**) over 6 hours. Thus, bitterant-induced Ca<sup>2+</sup> elevation is required for  $\Delta\Psi_m$  depolarization and apoptosis.

To test physiological relevance, we examined bitterant-induced apoptosis in de-ciliated squamous primary human bronchial epithelial (HBE) cells exposed to apical submersion and fully differentiated ciliated cultures exposed to apical air (**Fig. 7A and Supplementary Fig. S17**). Bitter agonists increased Annexin V staining over 3-6 hrs in squamous but not ciliated cultures (**Fig. 7B-C**). To tie these responses to T2Rs, similar differentiated vs squamous primary nasal cultures were stimulated with T2R38 agonist PTC. PTC increased annexin V staining only in squamous cultures homozygous for the functional T2R38 (PAV polymorphism). Cultures homozygous for non-functional T2R38 (AVI polymorphism) did not exhibit increased

*T2R regulation of nuclear calcium and apoptosis*

annexin V staining (**Fig. 7D-E**), suggesting increased Annexin V-staining is dependent on functional T2R38. Submerged squamous HBEs also showed staining with propidium iodide (PI; reflecting permeabilization) 6 hours after bitterant stimulation (**Fig. 7F-G**), likely reflecting secondary necrosis in the absence of phagocytes [41]. The earlier onset of Annexin V versus PI staining supports apoptosis. These data suggest that T2R agonists activate apoptosis in squamous but not well-differentiated epithelial cells.

## Discussion

Some T2Rs are localized to cilia of differentiated cells [3, 7] but may localize to the nucleus in less differentiated cells. A prior study reported nuclear localization of T2R38 in tissue from CRS patients [34], though no function was reported. We show that T2R14 and T2R39, likely located on the nucleus of non-ciliated airway cells, signal through  $\text{Ca}^{2+}_{\text{nuc}}$ ,  $\text{cAMP}_{\text{nuc}}$ , and NO to increase  $\text{Ca}^{2+}_{\text{mito}}$  and depolarize  $\Delta\Psi_m$ , initiating apoptosis. Bitterants [42-45] and bacterial products [46, 47] activate apoptosis and denatonium alters  $\Delta\Psi_m$  [45], but was attributed to oxidative stress [45]. We suggest that T2R activation elevates  $\text{Ca}^{2+}_{\text{nuc}}$  and  $\text{Ca}^{2+}_{\text{mito}}$  to activate  $\Delta\Psi_m$  depolarization to initiate apoptosis. We hypothesize that intense  $\text{Ca}^{2+}_{\text{nuc}}$  increase in close proximity to mitochondria overloads  $\text{Ca}^{2+}_{\text{mito}}$ .

We hypothesize that absence or loss of motile cilia causes some T2Rs to alternatively localize to nuclei. Both endogenous or heterologous T2R14 and T2R39 can localize to the nucleus. Many GPCRs localize to the nucleus and regulate processes like proliferation or synaptic function [32, 48]. Some nuclear GPCRs may act as transcription factors [49]. Nuclear GPCRs may have unique localization sequences [48]; mGluR5 receptor localizes to the nucleus through C-terminal sequences [36]. The ratio of plasma membrane-to-nuclear mGluR5 varies among neuronal types [50], suggesting that trafficking depends on additional factors. Masking the C-terminus of T2R14 or T2R39 with GFP reduced nuclear localization, suggesting C-terminal interactions are important. Future studies must identify sequences important for nuclear and/or cilia localization. Transport of proteins into cilia and nuclei involves shared components [51], including importins and nucleoporins [52-54]. This may be due to movement of signaling molecules from the cilia to the nucleus during primary ciliary signaling and regulation of transcription [55]. We hypothesize that, in de-ciliated airway cells, the nuclear membrane may become a reservoir for GPCRs that would normally traffic to the cilia under normal conditions.

Non-ciliated squamous airway cell T2Rs retain the ability to activate NO production, as observed during activation of T2Rs in ciliated cells [3, 5]. While eNOS is localized to the cilia base in airway epithelial cells [56, 57], eNOS localizes to the nucleus in some cells [58, 59]. Altered localization of eNOS to the nucleus by loss of cilia may facilitate coupling T2Rs to NO despite altered T2R localization.

Many bitterants are hydrophobic, allowing them to activate intracellular T2Rs. Quinine rapidly permeates taste and other cells [60, 61]. Bacterial agonists like 3-oxo-C12-HSL are cell permeant [62] and reach extracellular concentrations up to hundreds of  $\mu\text{M}$  in late stationary cultures of *P. aeruginosa* [63]. Colonization of bacteria during airway infection could generate localized AHL levels high enough to enter the cell and activate T2R  $\text{Ca}^{2+}_{\text{nuc}}$ .  $\text{Ca}^{2+}_{\text{nuc}}$  is linked to proliferation [64] and regulation of transcription [65]. Mitochondrial-to-nuclear  $\text{Ca}^{2+}$  signaling may regulate gene expression [66, 67]. We show that reverse nuclear-to-mitochondrial  $\text{Ca}^{2+}$  can regulate apoptosis.

Apoptosis is part of innate immune defense [68] and may be a “last resort” response to bacterial metabolites during sustained infection or during diseases involving epithelial remodeling, but may also allow bacteria to damage inflamed or remodeled epithelia as bitter bacterial metabolites activate T2Rs,  $\text{Ca}^{2+}_{\text{nuc}}$ , and apoptosis in de-ciliated cells. There are also potentially important implications for epithelial-derived lung cancers. We report  $\text{Ca}^{2+}_{\text{nuc}}$  and apoptosis in lung cancer lines but not in well-differentiated primary cells. T2R agonists may therapeutically activate apoptosis in tumor but not differentiated cells. T2R activation by bacterial metabolites may also contribute to tumor-microbiome crosstalk. Whether activation of T2R-induced  $\text{Ca}^{2+}_{\text{nuc}}$  and apoptosis is detrimental or beneficial in non-ciliated epithelial cells thus likely depends on disease context.



**Materials Availability:** All materials will be provided upon reasonable request to RJL

([rjl@pennmedicine.upenn.edu](mailto:rjl@pennmedicine.upenn.edu)).

**Acknowledgements:** We thank Maureen Victoria (University of Pennsylvania) for technical assistance and discussion and Andrew Ramsey (University of Pennsylvania) and Alfred Sloan (Synthego) for helpful discussion.

**Funding:** This study was supported by National Institutes of Health Grant DC016309. The funder had no role in study design, data collection, analysis, interpretation, or decision to submit.

**Author Contributions:** Conceptualization and Visualization: D.B.M. and R.J.L.; Investigation and Formal Analysis: D.B.M., L.E.K., M.E.J., P.O.J., R.L.J.H., R.M.C., and R.J.L.; Writing – Original Draft: D.B.M.; Writing – Review and Editing: D.B.M. and R.J.L.; Data Curation and Resources: N.D.A. and J.N.P.; Funding Acquisition and Supervision: R.J.L.

**Conflict of interest:** The authors declare no competing interests.

## Figure Legends

**Fig. 1 Denatonium-induced T2R-mediated  $\text{Ca}^{2+}$  release is strongly localized to the nucleus in Beas-2B cells.** **A** Beas-2B cells, a bronchial line with squamous phenotype in the presence of FBS [23], were loaded with  $\text{Ca}^{2+}$  dye Fluo-8. Fluo-8 fluorescence trace and representative image during stimulation with denatonium, showing nuclear  $\text{Ca}^{2+}$  release. Scale bar = 10  $\mu\text{m}$ . **B** Representative traces showing Beas-2B cells co-expressing G-GECO ( $\text{Ca}^{2+}_i$ ) or R-GECO-nls ( $\text{Ca}^{2+}_{\text{nuc}}$ ) and preferential activation of  $\text{Ca}^{2+}_{\text{nuc}}$  with denatonium. Scale bar = 10  $\mu\text{m}$ . **C-E** Traces and bar graph showing  $\text{Ca}^{2+}_i$  (Fluo-8; **C-D**) and  $\text{Ca}^{2+}_{\text{nuc}}$  (R-GECO-nls; **E**) with quorum sensing molecule and T2R agonist 3-oxo-C12-HSL. **F**  $\text{Ca}^{2+}_{\text{nuc}}$  (R-GECO-nls) responses in cells  $\pm$  10  $\mu\text{M}$  BAPTA-AM for 1 hr  $\pm$  extracellular calcium. 0- $\text{Ca}^{2+}_o$  buffer contained no added  $\text{Ca}^{2+}$  plus 2 mM EGTA to chelate trace  $\text{Ca}^{2+}$ . **G-H** Inhibition of denatonium-induced Fluo-8 and R-GECO-nls responses with YM-254890 (1  $\mu\text{M}$ , 1 hr pre-treatment). **I-J** Bar graphs showing inhibition of 15 mM denatonium-induced  $\text{Ca}^{2+}_i$  and  $\text{Ca}^{2+}_{\text{nuc}}$  with PLC inhibitor U73122 (1  $\mu\text{M}$ ; either 2 min or 1 hr pretreatment) but not inactive control analogue U73343. **K** Beas-2B's stably expressing shRNA targeting either T2R10 or 14, but not T2R8 have reduced bitterant-induced  $\text{Ca}^{2+}_{\text{nuc}}$  signaling. All traces are representative experiments from  $\geq 3$  independent experiments. Bar graphs show mean  $\pm$  SEM from  $\geq 3$  experiments; significance by T-test (D,G,H) or 1-way ANOVA with Tukey's posttest (I-K), \*\* $P < 0.01$ , \*\*\* $P < 0.001$ , \*\*\*\* $P < 0.0001$ .

**Fig. 2 T2R agonists alter  $\text{cAMP}_{\text{nuc}}$  concomitantly with  $\text{Ca}^{2+}_{\text{nuc}}$ .** **A-B** Traces showing  $\text{cAMP}_i$  (A) and  $\text{cAMP}_{\text{nuc}}$  (B) decrease and  $\text{Ca}^{2+}_{\text{nuc}}$  increase (C) in response to T2R agonist diphenidol in Beas-2B cells. **C-D** Traces showing  $\text{cAMP}_{\text{nuc}}$  and  $\text{Ca}^{2+}_{\text{nuc}}$  in response to T2R agonist quinine Beas-2B (C) and HEK 239T (D) cells. **E** Bar graph showing peak  $\text{Ca}^{2+}_{\text{nuc}}$  in Beas-2B cells transfected with WT or non-functional (G203A A326S; [69])  $\alpha$ -gustducin. Traces represent 1

experiment from a minimum of 3 experiments. Bar graph represents mean  $\pm$  SEM from 3 experiments; significance determined by 1-way ANOVA using Bonferroni post hoc test, \*\*\* $P < 0.001$ .

**Fig. 3 Non-ciliated airway cells produce nitric oxide in response to bitter compounds. A-**

**B** 16HBE cells were incubated with NO-sensing fluorescent probe, DAF-FM, which terminally reacts with NO and becomes fluorescent. Denatonium benzoate and FFA, but not sodium benzoate activated NO production that was blocked by NO scavenger cPTIO. **C** NOS inhibitor, L-NAME, blocks denatonium-induced NO production. Negative control D-NAME had no effect. **D** Bar graph summarizing NO production after 5 min from 16HBE experiments as in A-C). **E-F** Cyclic guanosine monophosphate (cGMP) is produced when NO activates soluble guanylyl cyclase. Airway cells expressing cGMP biosensor, GENie, increase cGMP, a downstream member of the NO pathway, in response to 500  $\mu$ M flufenamic acid, 15 mM denatonium benzoate, or positive control 270  $\mu$ M SNAP (NO donor). **I** NO production does not alter denatonium-induced  $Ca^{2+}_i$  signaling in Beas-2B or 16HBE cells pretreated with L-NAME (100  $\mu$ M, 1hr). Traces are representative experiments from 3 experiments. Data points on bar graph represent mean  $\pm$  SEM from 3 experiments; significance determined by 1-way ANOVA using Sidak's posttest.

**Fig. 4 Nuclear localization of T2R14 and T2R39. A-D** Fixed cultures of non-ciliated airway cells stained with antibodies targeting T2R14, T2R39, and Gustducin. CRISPR-cas9-induced scramble or T2R39 KO cell lines were stained for T2R39. **E-F** T2R38 and T1R2 are not localized to the nucleus in Calu-3 (lung adenocarcinoma) or ELE2 (hBMI immortalized primary bronchial epithelial cells) respectively. A-F scale bar is 10  $\mu$ m. **G** Differentiated primary nasal epithelial cells contain T2R14 and T2R38 on cilia, not nuclei. All images are representative image from  $\geq 3$  independent experiments. Scale bar is 25  $\mu$ m. **H** Fixed HEK cells expressing

ectopic myc-tagged T2R14, T2R39, or T2R10 and co-expressing mCherry Lamin-A stained with anti-myc antibody, showing nuclear localization of T2R14 and T2R39. **I** Representative images showing GFP-T2R39 but not T2R39-GFP localizes to the nucleus in fixed HEK 239T cells. **J** Nuclei from HEK cells expressing GFP-T2R39 or T2R39-GFP. For all images, 1 representative image from  $\geq 3$  experiments were shown. For all images scale bars represent 10  $\mu\text{m}$ .

**Fig. 5 Acute transient  $\text{Ca}^{2+}_{\text{mito}}$  elevation in airway cells treated with T2R agonists. A**

Fluorescence images of nuclear stain DAPI and MitoTracker in A549, Beas-2B, and 16HBE cells, plus immunofluorescence for Golgi marker golgin-97 in A549 cells. Scale bars are 10  $\mu\text{m}$ .

**B** Trace of ratiometric CFP/YFP FRET-based mitochondrial-targeted  $\text{Ca}^{2+}$  indicator 4mtD3cpV in 16HBEs showing elevation of intracellular  $\text{Ca}^{2+}$  by  $\text{Ca}^{2+}$  ATPase inhibitor thapsigargin in 0- $\text{Ca}^{2+}_{\text{o}}$  HBSS (no added  $\text{Ca}^{2+}$  and 2 mM EGTA) increased mitochondrial  $\text{Ca}^{2+}$ , demonstrating that store  $\text{Ca}^{2+}$  release can elevate  $\text{Ca}^{2+}_{\text{mito}}$ . **C,D** Trace showing stimulation of Beas-2Bs with denatonium or flufenamic acid increased  $\text{Ca}^{2+}_{\text{mito}}$ . **E** Trace showing minimal  $\text{Ca}^{2+}_{\text{mito}}$  response in HEK cells, which also do not exhibit  $\text{Ca}^{2+}_{\text{nuc}}$  responses to denatonium. **F** Trace showing denatonium elevated  $\text{Ca}^{2+}_{\text{mito}}$  in 16HBE cells. **G** This elevation of  $\text{Ca}^{2+}_{\text{mito}}$  was blocked by pre-treatment with PLC inhibitor U72122 or  $\text{IP}_3\text{R}$  inhibitor xestospongin C (XeC). Note that DMSO concentration (0.1%) is the same for all conditions, so inactive U73343 pretreatment also serves as vehicle control for XeC. **H** Bar graph showing peak 4mtD3CPV responses represented as mean  $\pm$  SEM from independent experiments shown in **B-G**. All traces show representative results from  $\geq 4$  transfected cells from one of  $\geq 4$  independent experiments imaged at 60x.

**Fig. 6 Denatonium halts cell proliferation, depolarizes mitochondrial membrane potential**

**( $\Psi_m$ ), and initiates apoptosis. A** Depiction of XTT assay. **B** Denatonium, not benzoate, halts A549 metabolism. **C** A549 metabolism is impaired by T2R agonists chrysin and denatonium at concentrations  $>1$  mM. **D** Mitochondrial membrane potential detection dye JC-1 shifts from red

to green fluorescence with depolarization. **E-G** Traces and bar graph of ratiometric mitochondrial membrane potential dye (JC-1) showing that denatonium, not benzoate, initiates mitochondrial membrane depolarization in 16HBEs (*E*) and Beas-2Bs (*F-G*). **H** Trace showing fluorescence increases signifying caspase activation in Beas-2Bs were incubated with denatonium and CellEvent caspase-3/7 detection. **I** Bar graph CellEvent fluorescence at 6 hours, indicating caspase activation in A549s in response to quinine and in Beas-2Bs in response to 3-oxo-C12HSL and diphenhydramine. Staurosporine = positive control. **J** Does response of peak  $\text{Ca}^{2+}_{\text{nuc}}$  (R-GECO-nls) in Beas-2B treated with denatonium. **K-L** Beas-2Bs were pre-incubated with 10  $\mu\text{M}$  BAPTA in 0- $\text{Ca}^{2+}$  HBSS then treated with denatonium in JC-1 (*K*) or CellEvent (*L*) assays. Time course experiments are representative of  $\geq 3$  independent experiments. Bar graphs show mean  $\pm$  SEM from  $\geq 3$  experiments. Significance by 1-way ANOVA using Dunnett's or Tukey's posttest \* $P < 0.05$ , \*\*\* $P < 0.0005$  \*\*\*\* $P < 0.0001$ .

**Fig. 7 T2R agonists induce cell death in submerged but not differentiated primary HBE**

**and sinonasal cells.** **A** Primary HBE cells grown on transwells and differentiated at air liquid interface (ALI) were exposed to 4 days of air or apical submersion (as described in the Methods and [17]). Apical submersion increases squamous differentiation ([17, 70, 71] and

**Supplementary Fig. S17).** **B** Denatonium benzoate, thujone, or 3-oxo-C12HSL increased Annexin V FITC staining in deciliated (submerged) but not differentiated HBE cells.

Representative intensity pseudocolored images shown. Scale bar 100  $\mu\text{m}$ . Sodium benzoate (control for denatonium benzoate) had no effect. **C** Bar graphs of relative fluorescence intensity (mean  $\pm$  SEM) from 4 cultures (2 each from 2 donors) per condition stained at 3 (left) or 6 hours (right). Green bars show air-exposed; magenta bars show submerged. Significance by 1-way ANOVA, Bonferroni posttest; \*\* $p < 0.01$  between bracketed bars (submerged vs air-exposed) and ## $p < 0.01$  vs HBSS only. **D** Experiments carried out similarly to *A-B* in *TAS2R38*-genotyped primary nasal cultures  $\pm$  500  $\mu\text{M}$  PTC. *TAS2R38* (encoding T2R38) has two polymorphisms

*T2R regulation of nuclear calcium and apoptosis*

Mendelianly-distributed in the Philadelphia population [72]. The PAV allele encodes a functional receptor while the AVI allele encodes a non-functional receptor [73]. ALIs from PAV/PAV patient cells exhibit  $\text{Ca}^{2+}$  responses to T2R38-specific agonist PTC while ALIs from AVI/AVI homozygous patient cells do not [3]. Representative images show Annexin V-FITC staining at 6 hrs, which increased in PAV/PAV cells exposed to submersion but not air-exposed cells. Staining did not increase in AVI/AVI cells under either condition. **E** Bar graph of mean  $\pm$  SEM of Annexin V FITC staining from 4 cultures per condition, each from a separate PAV/PAV or AVI/AVI patient. Significance by 1-way ANOVA with Bonferroni posttest; \*\* $p < 0.01$  between bracketed bars (submerged vs air-exposed) and  $^{\#\#}p < 0.01$  vs HBSS only. **F** Representative images of live-dead (Syto9 in green and propidium iodide [PI] in magenta) staining of HBE cells. **G** Bar graph (mean  $\pm$  SEM, 4 cultures per condition, 2 each from 2 donors) of PI-labeled area from experiments as in *E*. Significance by 1-way ANOVA, Bonferroni posttest; \*\* $p < 0.01$  between bracketed bars (submerged vs air-exposed) and  $^{\#\#}p < 0.01$  vs HBSS only.

## REFERENCES

1. Stevens WW, Lee RJ, Schleimer RP, Cohen NA. Chronic rhinosinusitis pathogenesis. *J Allergy Clin Immunol* 2015, **136**(6): 1442-1453.
2. Kuek LE, Lee RJ. First contact: the role of respiratory cilia in host-pathogen interactions in the airways. *Am J Physiol Lung Cell Mol Physiol* 2020, **319**(4): L603-L619.
3. Lee RJ, Xiong G, Kofonow JM, Chen B, Lysenko A, Jiang P, *et al.* T2R38 taste receptor polymorphisms underlie susceptibility to upper respiratory infection. *J Clin Invest* 2012, **122**(11): 4145-4159.
4. Jaggupilli A, Singh N, Jesus VC, Duan K, Chelikani P. Characterization of the Binding Sites for Bacterial Acyl Homoserine Lactones (AHLs) on Human Bitter Taste Receptors (T2Rs). *ACS Infect Dis* 2018, **4**(7): 1146-1156.
5. Carey RM, Lee RJ. Taste Receptors in Upper Airway Innate Immunity. *Nutrients* 2019, **11**(9).
6. Hariri BM, McMahon DB, Chen B, Freund JR, Mansfield CJ, Doghramji LJ, *et al.* Flavones modulate respiratory epithelial innate immunity: Anti-inflammatory effects and activation of the T2R14 receptor. *J Biol Chem* 2017, **292**(20): 8484-8497.
7. Shah AS, Ben-Shahar Y, Moninger TO, Kline JN, Welsh MJ. Motile cilia of human airway epithelia are chemosensory. *Science* 2009, **325**(5944): 1131-1134.
8. Fang FC. Perspectives series: host/pathogen interactions. Mechanisms of nitric oxide-related antimicrobial activity. *J Clin Invest* 1997, **99**(12): 2818-2825.
9. Wink DA, Hines HB, Cheng RY, Switzer CH, Flores-Santana W, Vitek MP, *et al.* Nitric oxide and redox mechanisms in the immune response. *J Leukoc Biol* 2011, **89**(6): 873-891.
10. Akerstrom S, Gunalan V, Keng CT, Tan YJ, Mirazimi A. Dual effect of nitric oxide on SARS-CoV replication: viral RNA production and palmitoylation of the S protein are affected. *Virology* 2009, **395**(1): 1-9.
11. Akaberi D, Krambrich J, Ling J, Luni C, Hedenstierna G, Jarhult JD, *et al.* Mitigation of the replication of SARS-CoV-2 by nitric oxide in vitro. *Redox Biol* 2020, **37**: 101734.

12. Gohy ST, Hupin C, Fregimilicka C, Detry BR, Bouzin C, Gaide Chevronay H, *et al.* Imprinting of the COPD airway epithelium for dedifferentiation and mesenchymal transition. *Eur Respir J* 2015, **45**(5): 1258-1272.
13. Yaghi A, Dolovich MB. Airway Epithelial Cell Cilia and Obstructive Lung Disease. *Cells* 2016, **5**(4).
14. Jeffery PK, Brain AP. Surface morphology of human airway mucosa: normal, carcinoma or cystic fibrosis. *Scanning Microsc* 1988, **2**(1): 553-560.
15. Park KS, Wells JM, Zorn AM, Wert SE, Laubach VE, Fernandez LG, *et al.* Transdifferentiation of ciliated cells during repair of the respiratory epithelium. *Am J Respir Cell Mol Biol* 2006, **34**(2): 151-157.
16. Sisson JH, Papi A, Beckmann JD, Leise KL, Wisecarver J, Brodersen BW, *et al.* Smoke and viral infection cause cilia loss detectable by bronchoalveolar lavage cytology and dynein ELISA. *Am J Respir Crit Care Med* 1994, **149**(1): 205-213.
17. Carey RM, Freund JR, Hariri BM, Adappa ND, Palmer JN, Lee RJ. Polarization of protease-activated receptor 2 (PAR-2) signaling is altered during airway epithelial remodeling and deciliation. *J Biol Chem* 2020, **295**(19): 6721-6740.
18. Munye MM, Shoemark A, Hirst RA, Delhove JM, Sharp TV, McKay TR, *et al.* BMI-1 extends proliferative potential of human bronchial epithelial cells while retaining their mucociliary differentiation capacity. *Am J Physiol Lung Cell Mol Physiol* 2017, **312**(2): L258-L267.
19. Kim D, Pauer SH, Yong HM, An SS, Liggett SB. beta2-Adrenergic Receptors Chaperone Trapped Bitter Taste Receptor 14 to the Cell Surface as a Heterodimer and Exert Unidirectional Desensitization of Taste Receptor Function. *J Biol Chem* 2016, **291**(34): 17616-17628.
20. Gruenert DC, Willems M, Cassiman JJ, Frizzell RA. Established cell lines used in cystic fibrosis research. *J Cyst Fibros* 2004, **3 Suppl 2**: 191-196.
21. Suzuki K, Bose P, Leong-Quong RY, Fujita DJ, Riabowol K. REAP: A two minute cell fractionation method. *BMC Res Notes* 2010, **3**: 294.
22. Montoro DT, Haber AL, Biton M, Vinarsky V, Lin B, Birket SE, *et al.* A revised airway epithelial hierarchy includes CFTR-expressing ionocytes. *Nature* 2018, **560**(7718): 319-324.



23. Ke Y, Reddel RR, Gerwin BI, Miyashita M, McMenamin M, Lechner JF, *et al.* Human bronchial epithelial cells with integrated SV40 virus T antigen genes retain the ability to undergo squamous differentiation. *Differentiation* 1988, **38**(1): 60-66.
24. Zhao Y, Araki S, Wu J, Teramoto T, Chang YF, Nakano M, *et al.* An expanded palette of genetically encoded Ca(2)(+) indicators. *Science* 2011, **333**(6051): 1888-1891.
25. Velmurugan GV, White C. Calcium homeostasis in vascular smooth muscle cells is altered in type 2 diabetes by Bcl-2 protein modulation of InsP3R calcium release channels. *Am J Physiol Heart Circ Physiol* 2012, **302**(1): H124-134.
26. Meyerhof W, Batram C, Kuhn C, Brockhoff A, Chudoba E, Bufe B, *et al.* The molecular receptive ranges of human TAS2R bitter taste receptors. *Chem Senses* 2010, **35**(2): 157-170.
27. Peng Q, Alqahtani S, Nasrullah MZA, Shen J. Functional evidence for biased inhibition of G protein signaling by YM-254890 in human coronary artery endothelial cells. *European journal of pharmacology* 2020: 173706.
28. Ho HK, Bigliardi PL, Stelmashenko O, Ramasamy S, Postlethwaite M, Bigliardi-Qi M. Functionally expressed bitter taste receptor TAS2R14 in human epidermal keratinocytes serves as a chemosensory receptor. *Exp Dermatol* 2020.
29. Kim D, Woo JA, Geffken E, An SS, Liggett SB. Coupling of Airway Smooth Muscle Bitter Taste Receptors to Intracellular Signaling and Relaxation Is via Galphai1,2,3. *Am J Respir Cell Mol Biol* 2017, **56**(6): 762-771.
30. Odaka H, Arai S, Inoue T, Kitaguchi T. Genetically-encoded yellow fluorescent cAMP indicator with an expanded dynamic range for dual-color imaging. *PloS one* 2014, **9**(6): e100252.
31. Okashah N, Wan Q, Ghosh S, Sandhu M, Inoue A, Vaidehi N, *et al.* Variable G protein determinants of GPCR coupling selectivity. *Proc Natl Acad Sci U S A* 2019, **116**(24): 12054-12059.
32. Bkaily G, Al-Khoury J, Jacques D. Nuclear membranes GPCRs: implication in cardiovascular health and diseases. *Curr Vasc Pharmacol* 2014, **12**(2): 215-222.

33. Ribeiro-Oliveira R, Vojtek M, Goncalves-Monteiro S, Vieira-Rocha MS, Sousa JB, Goncalves J, *et al.* Nuclear G-protein-coupled receptors as putative novel pharmacological targets. *Drug Discov Today* 2019, **24**(11): 2192-2201.
34. Zborowska-Piskadlo K, Stachowiak M, Rusetska N, Sarnowska E, Siedlecki J, Dzaman K. The expression of bitter taste receptor TAS2R38 in patients with chronic rhinosinusitis. *Arch Immunol Ther Exp (Warsz)* 2020, **68**(5): 26.
35. Lee RJ, Chen B, Redding KM, Margolskee RF, Cohen NA. Mouse nasal epithelial innate immune responses to *Pseudomonas aeruginosa* quorum-sensing molecules require taste signaling components. *Innate Immun* 2014, **20**(6): 606-617.
36. Sergin I, Jong YI, Harmon SK, Kumar V, O'Malley KL. Sequences within the C Terminus of the Metabotropic Glutamate Receptor 5 (mGluR5) Are Responsible for Inner Nuclear Membrane Localization. *J Biol Chem* 2017, **292**(9): 3637-3655.
37. Sharma P, Panebra A, Pera T, Tiegs BC, Hershfeld A, Kenyon LC, *et al.* Antimitogenic effect of bitter taste receptor agonists on airway smooth muscle cells. *Am J Physiol Lung Cell Mol Physiol* 2016, **310**(4): L365-376.
38. Talmon M, Rossi S, Lim D, Pollastro F, Palattella G, Ruffinatti FA, *et al.* Absinthin, an agonist of the bitter taste receptor hTAS2R46, uncovers an ER-to-mitochondria Ca<sup>2+</sup>-shuttling event. *J Biol Chem* 2019, **294**(33): 12472-12482.
39. Palmer AE, Giacomello M, Kortemme T, Hires SA, Lev-Ram V, Baker D, *et al.* Ca<sup>2+</sup> indicators based on computationally redesigned calmodulin-peptide pairs. *Chem Biol* 2006, **13**(5): 521-530.
40. Duchen MR. Mitochondria and calcium: from cell signalling to cell death. *J Physiol* 2000, **529 Pt 1**: 57-68.
41. Nagata S. Apoptosis and Clearance of Apoptotic Cells. *Annual review of immunology* 2018, **36**: 489-517.
42. Jiang J, Lv Z, Qi L, Enayatullah H, Wei Q, Yu D, *et al.* Denatonium as a bitter taste receptor agonist damages jejunal epithelial cells of yellow-feathered chickens via inducing apoptosis. *Animal* 2019: 1-11.
43. Hamdard E, Shi Z, Lv Z, Zahir A, Wei Q, Rahmani MM, *et al.* Denatonium Benzoate-Induces Oxidative Stress in the Heart and Kidney of Chinese Fast Yellow Chickens by

Regulating Apoptosis, Autophagy, Antioxidative Activities and Bitter Taste Receptor Gene Expressions. *Animals (Basel)* 2019, **9**(9).

44. Martin LTP, Nachtigal MW, Selman T, Nguyen E, Salsman J, Dellaire G, *et al.* Bitter taste receptors are expressed in human epithelial ovarian and prostate cancers cells and noscapine stimulation impacts cell survival. *Mol Cell Biochem* 2019, **454**(1-2): 203-214.
45. Wen X, Zhou J, Zhang D, Li J, Wang Q, Feng N, *et al.* Denatonium inhibits growth and induces apoptosis of airway epithelial cells through mitochondrial signaling pathways. *Respir Res* 2015, **16**: 13.
46. Maurice NM, Bedi B, Yuan Z, Goldberg JB, Koval M, Hart CM, *et al.* Pseudomonas aeruginosa Induced Host Epithelial Cell Mitochondrial Dysfunction. *Sci Rep* 2019, **9**(1): 11929.
47. Schwarzer C, Fu Z, Shuai S, Babbar S, Zhao G, Li C, *et al.* Pseudomonas aeruginosa homoserine lactone triggers apoptosis and Bak/Bax-independent release of mitochondrial cytochrome C in fibroblasts. *Cell Microbiol* 2014, **16**(7): 1094-1104.
48. Jong YI, Harmon SK, O'Malley KL. GPCR signalling from within the cell. *Br J Pharmacol* 2018, **175**(21): 4026-4035.
49. Pupo M, Bodmer A, Berto M, Maggiolini M, Dietrich PY, Picard D. A genetic polymorphism repurposes the G-protein coupled and membrane-associated estrogen receptor GPER to a transcription factor-like molecule promoting paracrine signaling between stroma and breast carcinoma cells. *Oncotarget* 2017, **8**(29): 46728-46744.
50. Jong YI, Harmon SK, O'Malley KL. Location and Cell-Type-Specific Bias of Metabotropic Glutamate Receptor, mGlu(5), Negative Allosteric Modulators. *ACS chemical neuroscience* 2019, **10**(11): 4558-4570.
51. Kee HL, Verhey KJ. Molecular connections between nuclear and ciliary import processes. *Cilia* 2013, **2**(1): 11.
52. Bhosle VK, Rivera JC, Chemtob S. New insights into mechanisms of nuclear translocation of G-protein coupled receptors. *Small GTPases* 2019, **10**(4): 254-263.
53. Doufexis M, Storr HL, King PJ, Clark AJ. Interaction of the melanocortin 2 receptor with nucleoporin 50: evidence for a novel pathway between a G-protein-coupled receptor and the nucleus. *Faseb j* 2007, **21**(14): 4095-4100.

54. Pickard BW, Hodsman AB, Fraher LJ, Watson PH. Type 1 parathyroid hormone receptor (PTH1R) nuclear trafficking: association of PTH1R with importin alpha1 and beta. *Endocrinology* 2006, **147**(7): 3326-3332.
55. Satir P, Satir BH. The conserved ancestral signaling pathway from cilium to nucleus. *J Cell Sci* 2019, **132**(15).
56. Xue C, Botkin SJ, Johns RA. Localization of endothelial NOS at the basal microtubule membrane in ciliated epithelium of rat lung. *The journal of histochemistry and cytochemistry : official journal of the Histochemistry Society* 1996, **44**(5): 463-471.
57. Simet SM, Pavlik JA, Sisson JH. Proteomic analysis of bovine axonemes exposed to acute alcohol: role of endothelial nitric oxide synthase and heat shock protein 90 in cilia stimulation. *Alcoholism, clinical and experimental research* 2013, **37**(4): 609-615.
58. Ziolo MT, Biesiadecki BJ. Moving into a new neighborhood: NOS goes nuclear. *J Mol Cell Cardiol* 2013, **62**: 214-216.
59. Provost C, Choufani F, Avedanian L, Bkaily G, Gobeil F, Jacques D. Nitric oxide and reactive oxygen species in the nucleus revisited. *Canadian journal of physiology and pharmacology* 2010, **88**(3): 296-304.
60. Zubare-Samuelov M, Shaul ME, Peri I, Aliluiko A, Tirosh O, Naim M. Inhibition of signal termination-related kinases by membrane-permeant bitter and sweet tastants: potential role in taste signal termination. *American journal of physiology Cell physiology* 2005, **289**(2): C483-492.
61. Peri I, Mamrud-Brains H, Rodin S, Krizhanovsky V, Shai Y, Nir S, *et al.* Rapid entry of bitter and sweet tastants into liposomes and taste cells: implications for signal transduction. *American journal of physiology Cell physiology* 2000, **278**(1): C17-25.
62. Schwarzer C, Wong S, Shi J, Matthes E, Illek B, Janowski JP, *et al.* Pseudomonas aeruginosa Homoserine lactone activates store-operated cAMP and cystic fibrosis transmembrane regulator-dependent Cl<sup>-</sup> secretion by human airway epithelia. *J Biol Chem* 2010, **285**(45): 34850-34863.
63. Pearson JP, Gray KM, Passador L, Tucker KD, Eberhard A, Iglewski BH, *et al.* Structure of the autoinducer required for expression of Pseudomonas aeruginosa virulence genes. *Proc Natl Acad Sci U S A* 1994, **91**(1): 197-201.

64. Resende RR, Andrade LM, Oliveira AG, Guimaraes ES, Guatimosim S, Leite MF. Nucleoplasmic calcium signaling and cell proliferation: calcium signaling in the nucleus. *Cell Commun Signal* 2013, **11**(1): 14.
65. Ahlgren H, Bas-Orth C, Freitag HE, Hellwig A, Ottersen OP, Bading H. The nuclear calcium signaling target, activating transcription factor 3 (ATF3), protects against dendrotoxicity and facilitates the recovery of synaptic transmission after an excitotoxic insult. *J Biol Chem* 2014, **289**(14): 9970-9982.
66. Alonso MT, Villalobos C, Chamero P, Alvarez J, Garcia-Sancho J. Calcium microdomains in mitochondria and nucleus. *Cell calcium* 2006, **40**(5-6): 513-525.
67. Szabadkai G, Duchen MR. Mitochondria: the hub of cellular Ca<sup>2+</sup> signaling. *Physiology (Bethesda)* 2008, **23**: 84-94.
68. Jorgensen I, Rayamajhi M, Miao EA. Programmed cell death as a defence against infection. *Nat Rev Immunol* 2017, **17**(3): 151-164.
69. Liu P, Jia MZ, Zhou XE, De Waal PW, Dickson BM, Liu B, *et al.* The structural basis of the dominant negative phenotype of the Galphai1beta1gamma2 G203A/A326S heterotrimer. *Acta Pharmacol Sin* 2016, **37**(9): 1259-1272.
70. Lachowicz-Scroggins ME, Boushey HA, Finkbeiner WE, Widdicombe JH. Interleukin-13-induced mucous metaplasia increases susceptibility of human airway epithelium to rhinovirus infection. *Am J Respir Cell Mol Biol* 2010, **43**(6): 652-661.
71. Lopez-Souza N, Dolganov G, Dubin R, Sachs LA, Sassina L, Sporer H, *et al.* Resistance of differentiated human airway epithelium to infection by rhinovirus. *Am J Physiol Lung Cell Mol Physiol* 2004, **286**(2): L373-381.
72. Adappa ND, Farquhar D, Palmer JN, Kennedy DW, Doghramji L, Morris SA, *et al.* TAS2R38 genotype predicts surgical outcome in nonpolypoid chronic rhinosinusitis. *Int Forum Allergy Rhinol* 2016, **6**(1): 25-33.
73. Bufe B, Breslin PA, Kuhn C, Reed DR, Tharp CD, Slack JP, *et al.* The molecular basis of individual differences in phenylthiocarbamide and propylthiouracil bitterness perception. *Curr Biol* 2005, **15**(4): 322-327.

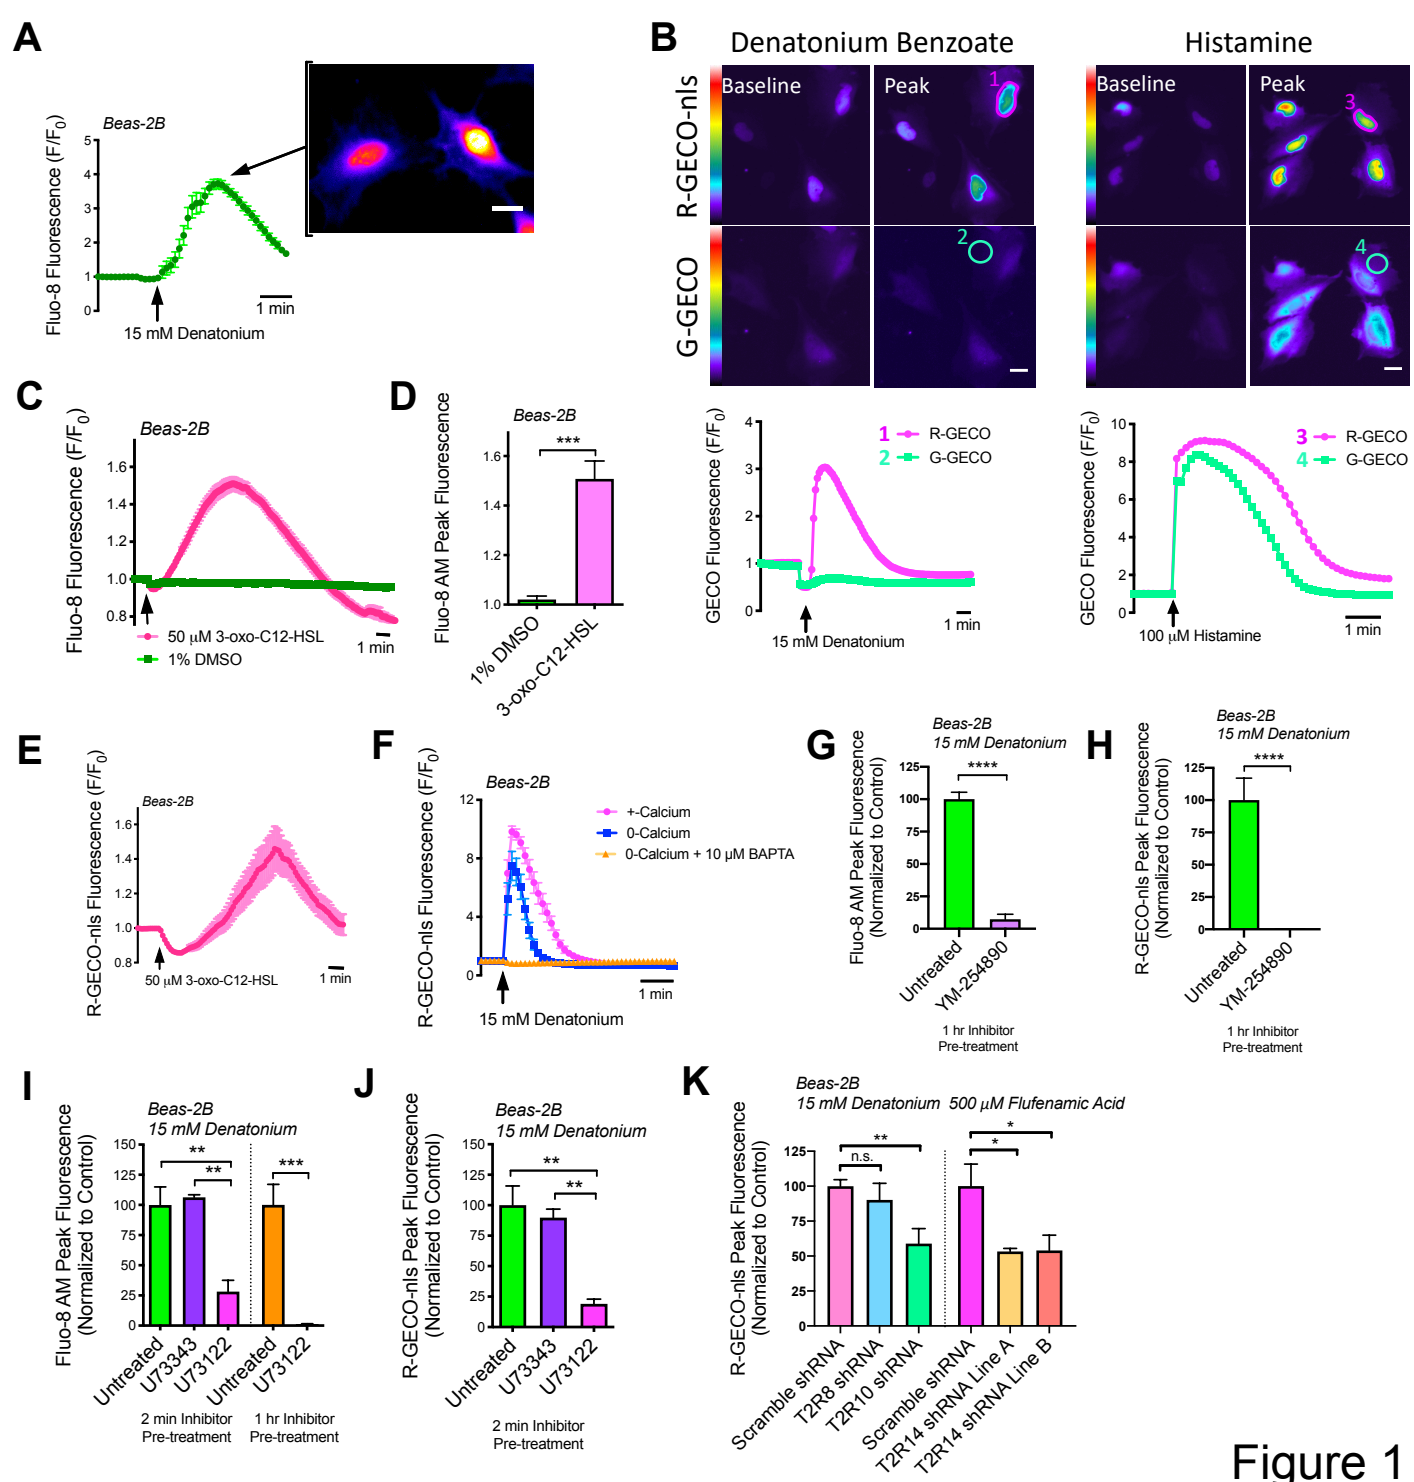

Figure 1

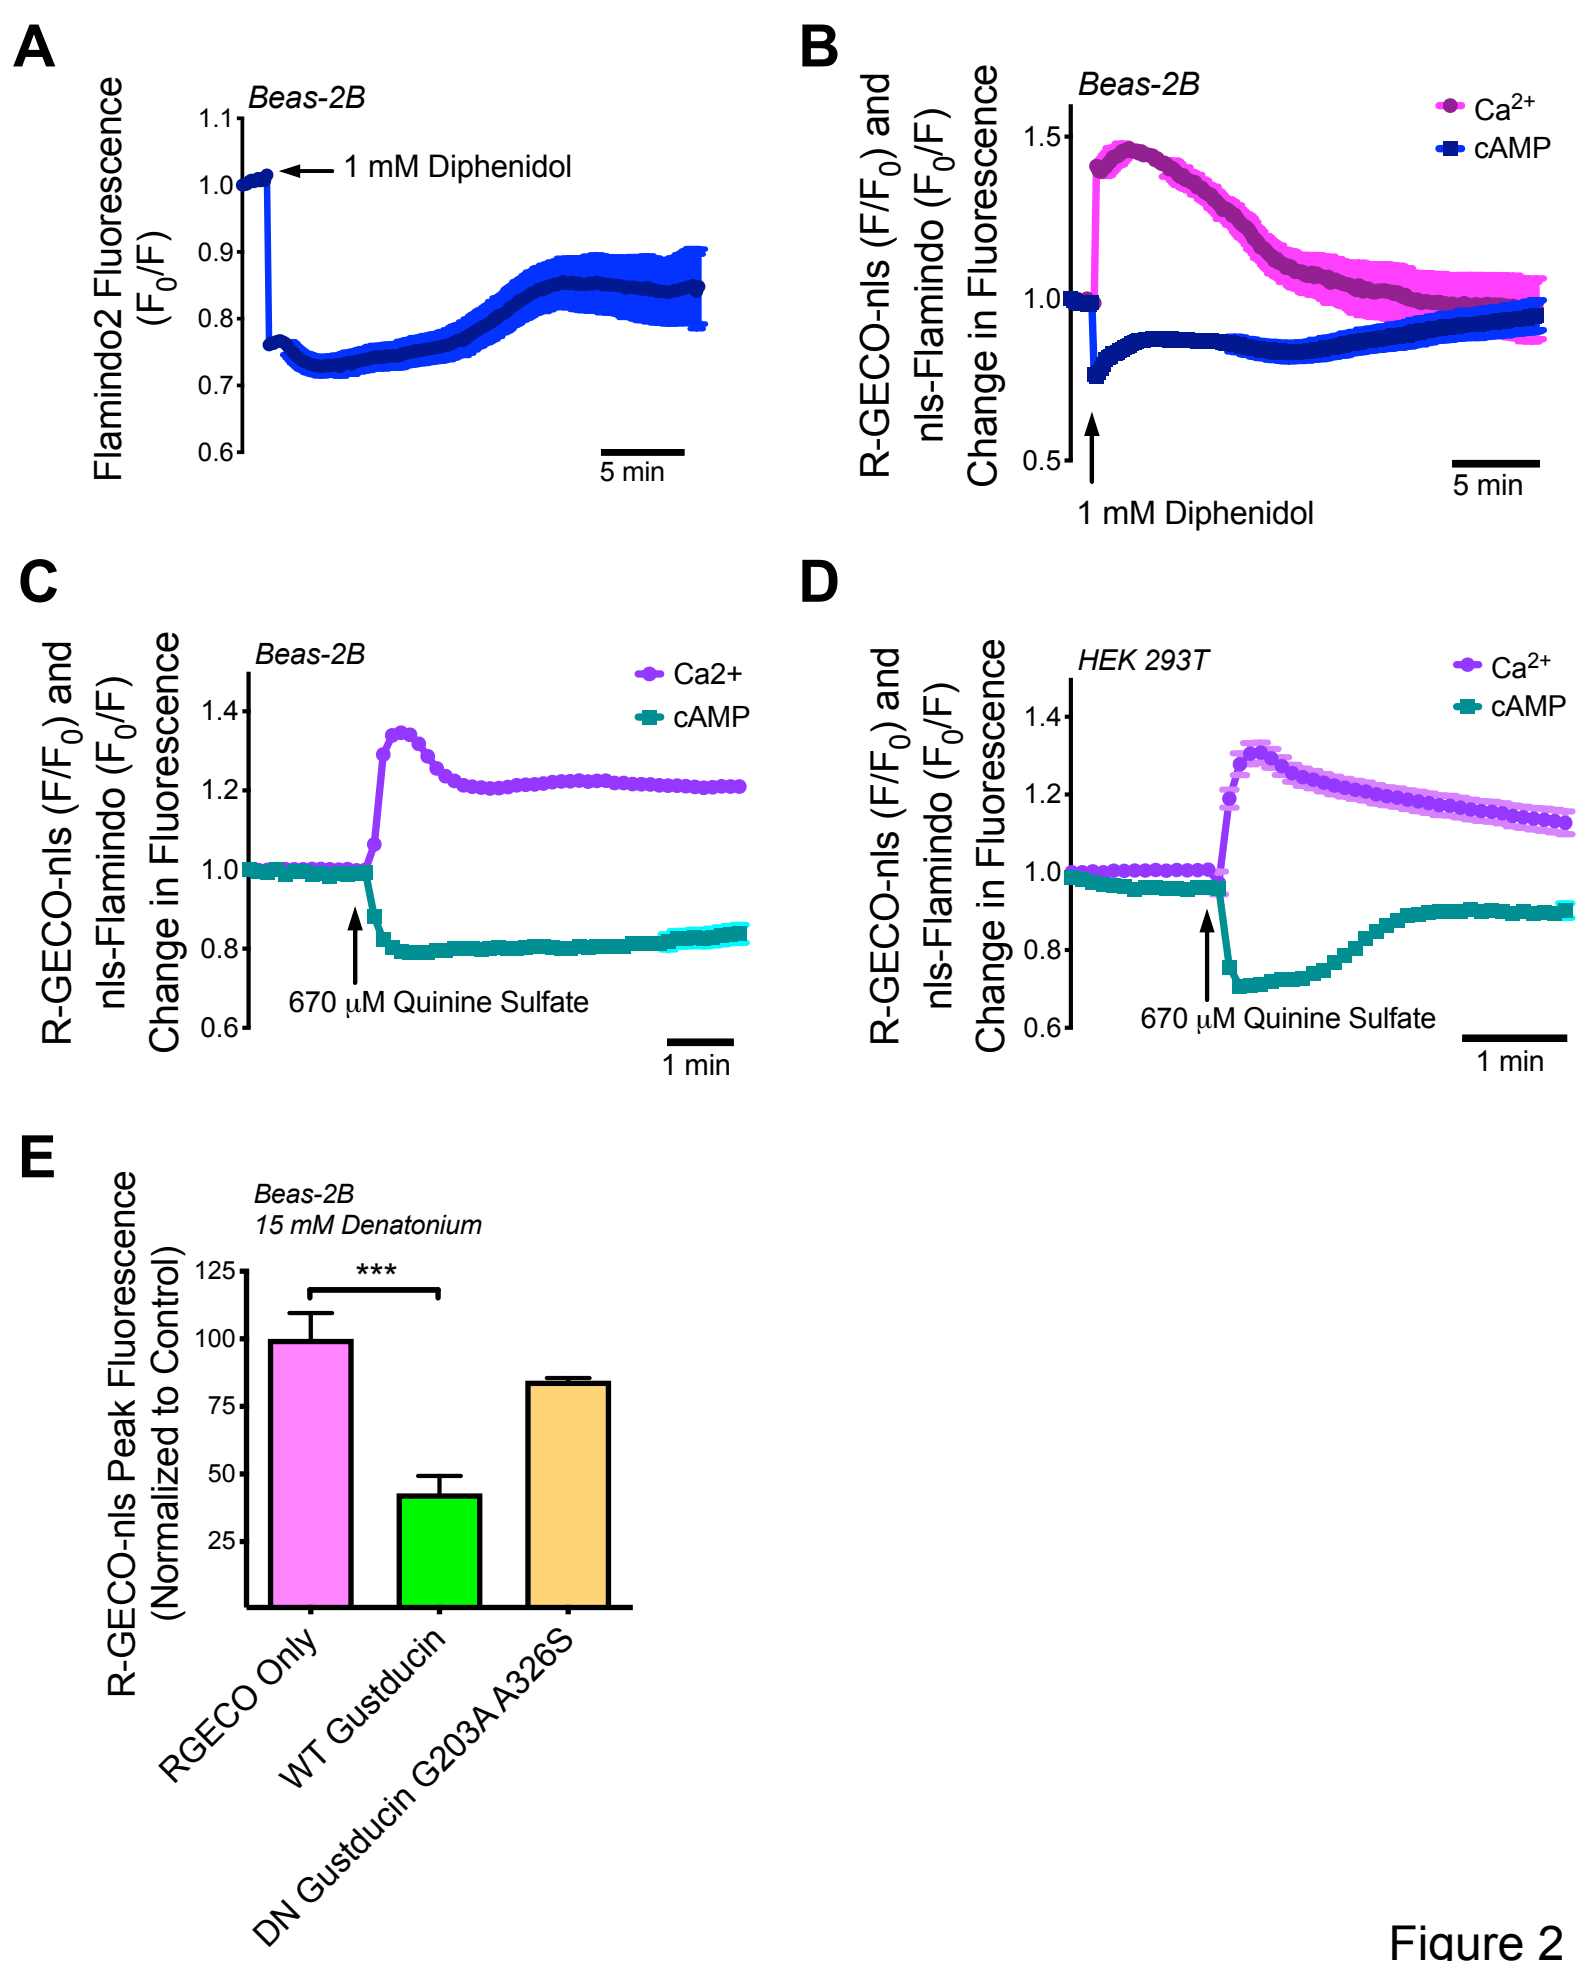

Figure 2

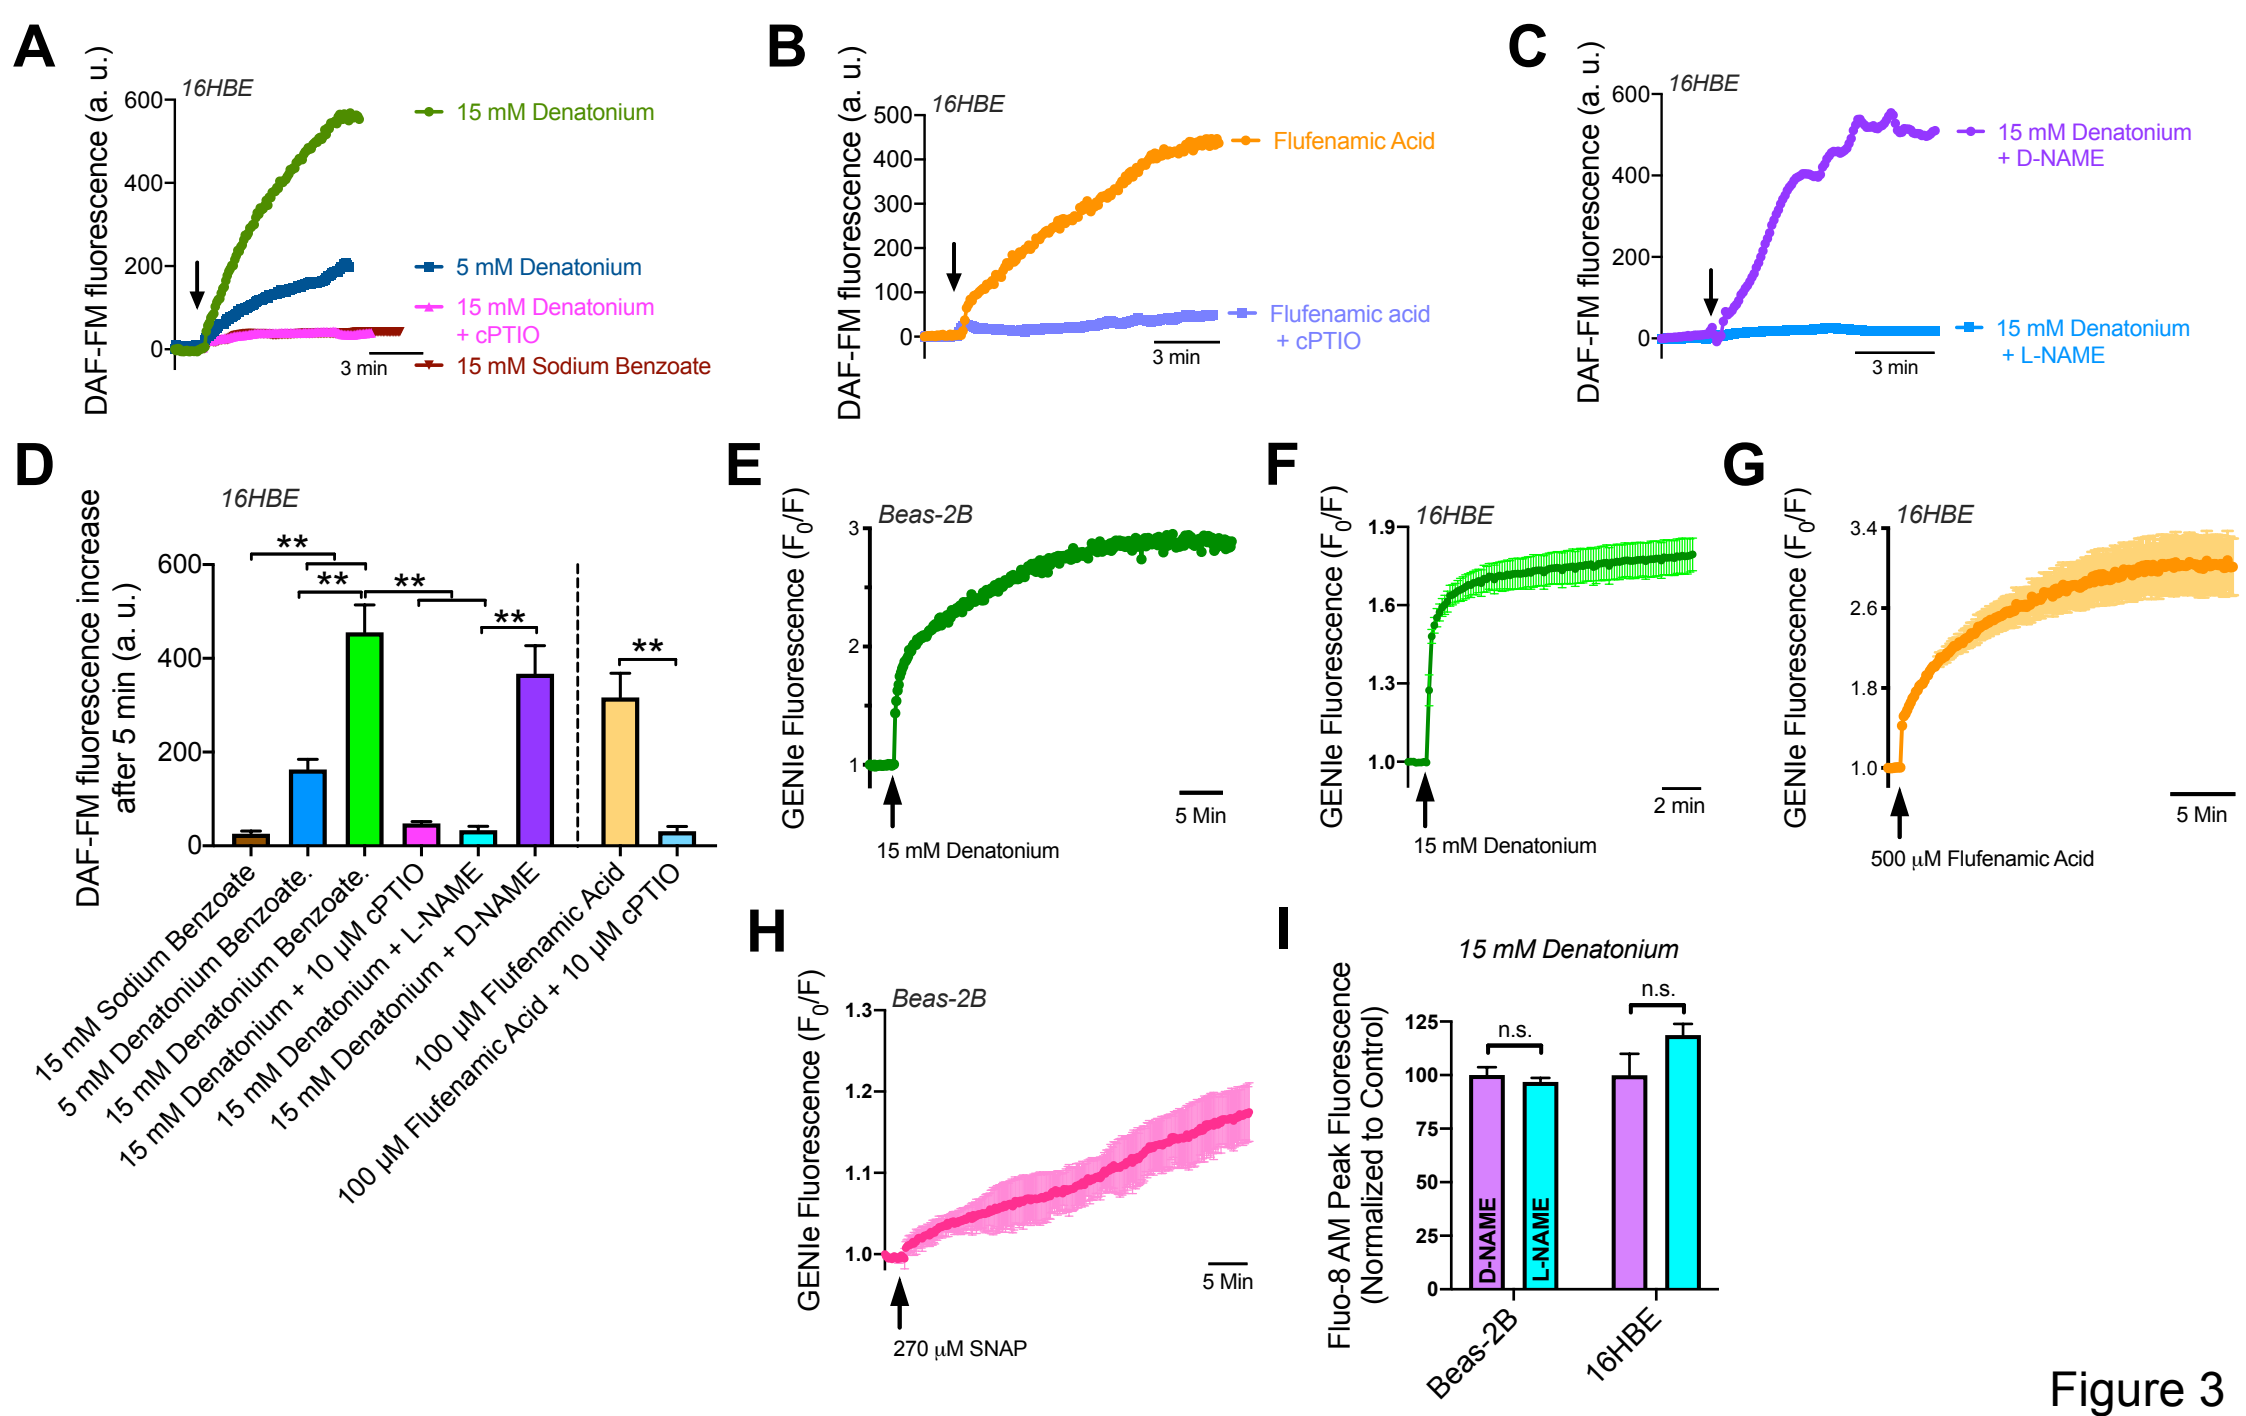

Figure 3



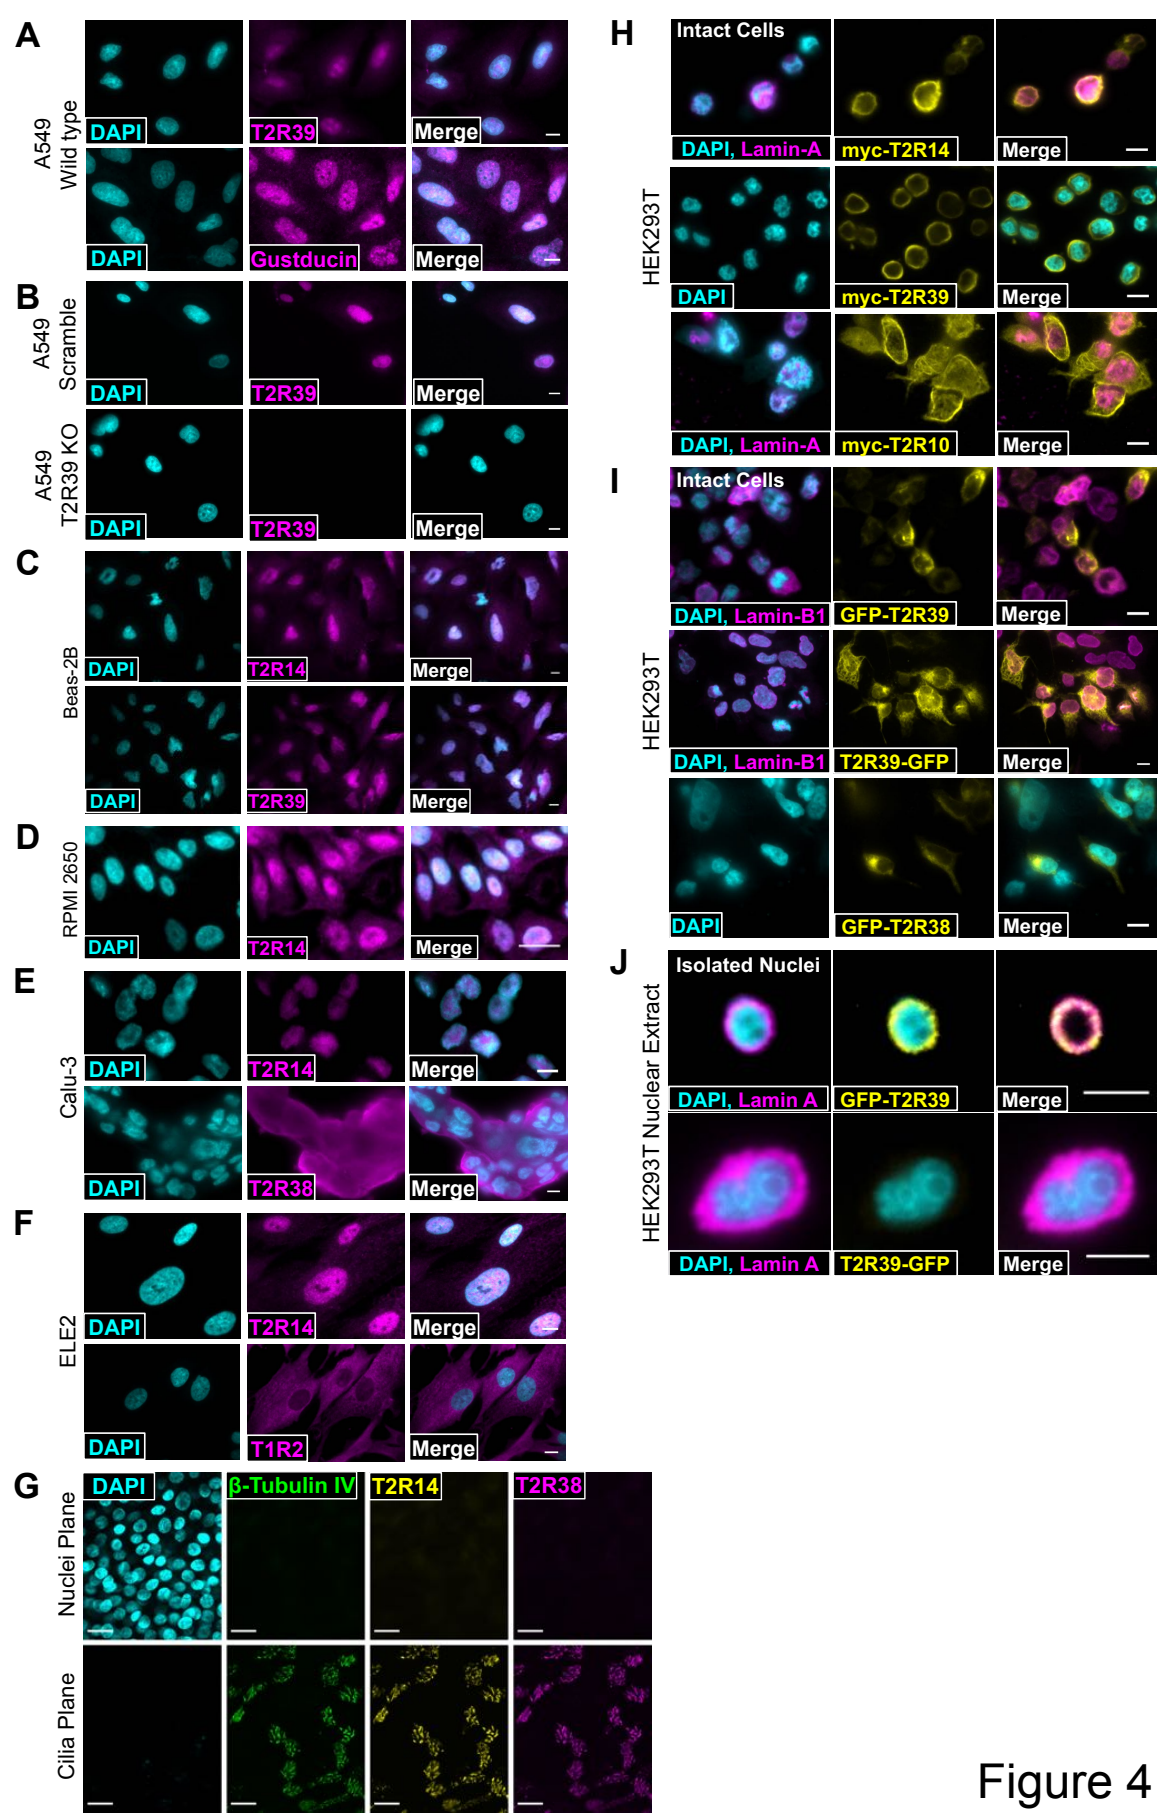

Figure 4

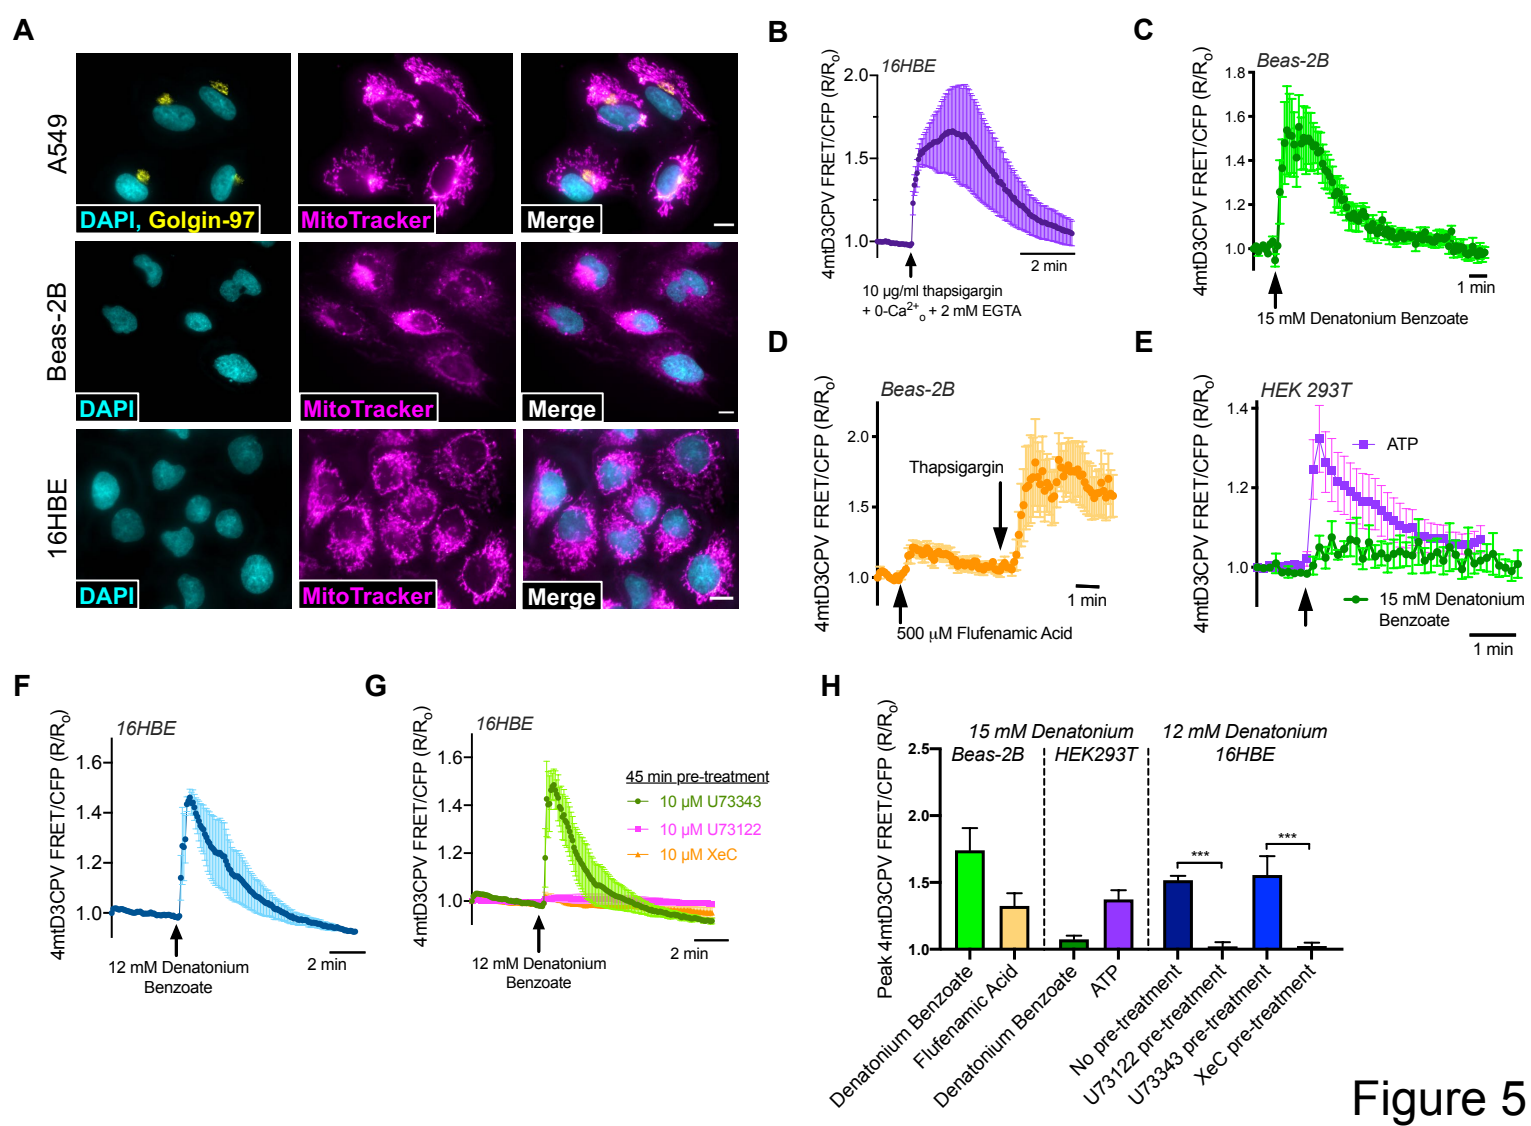

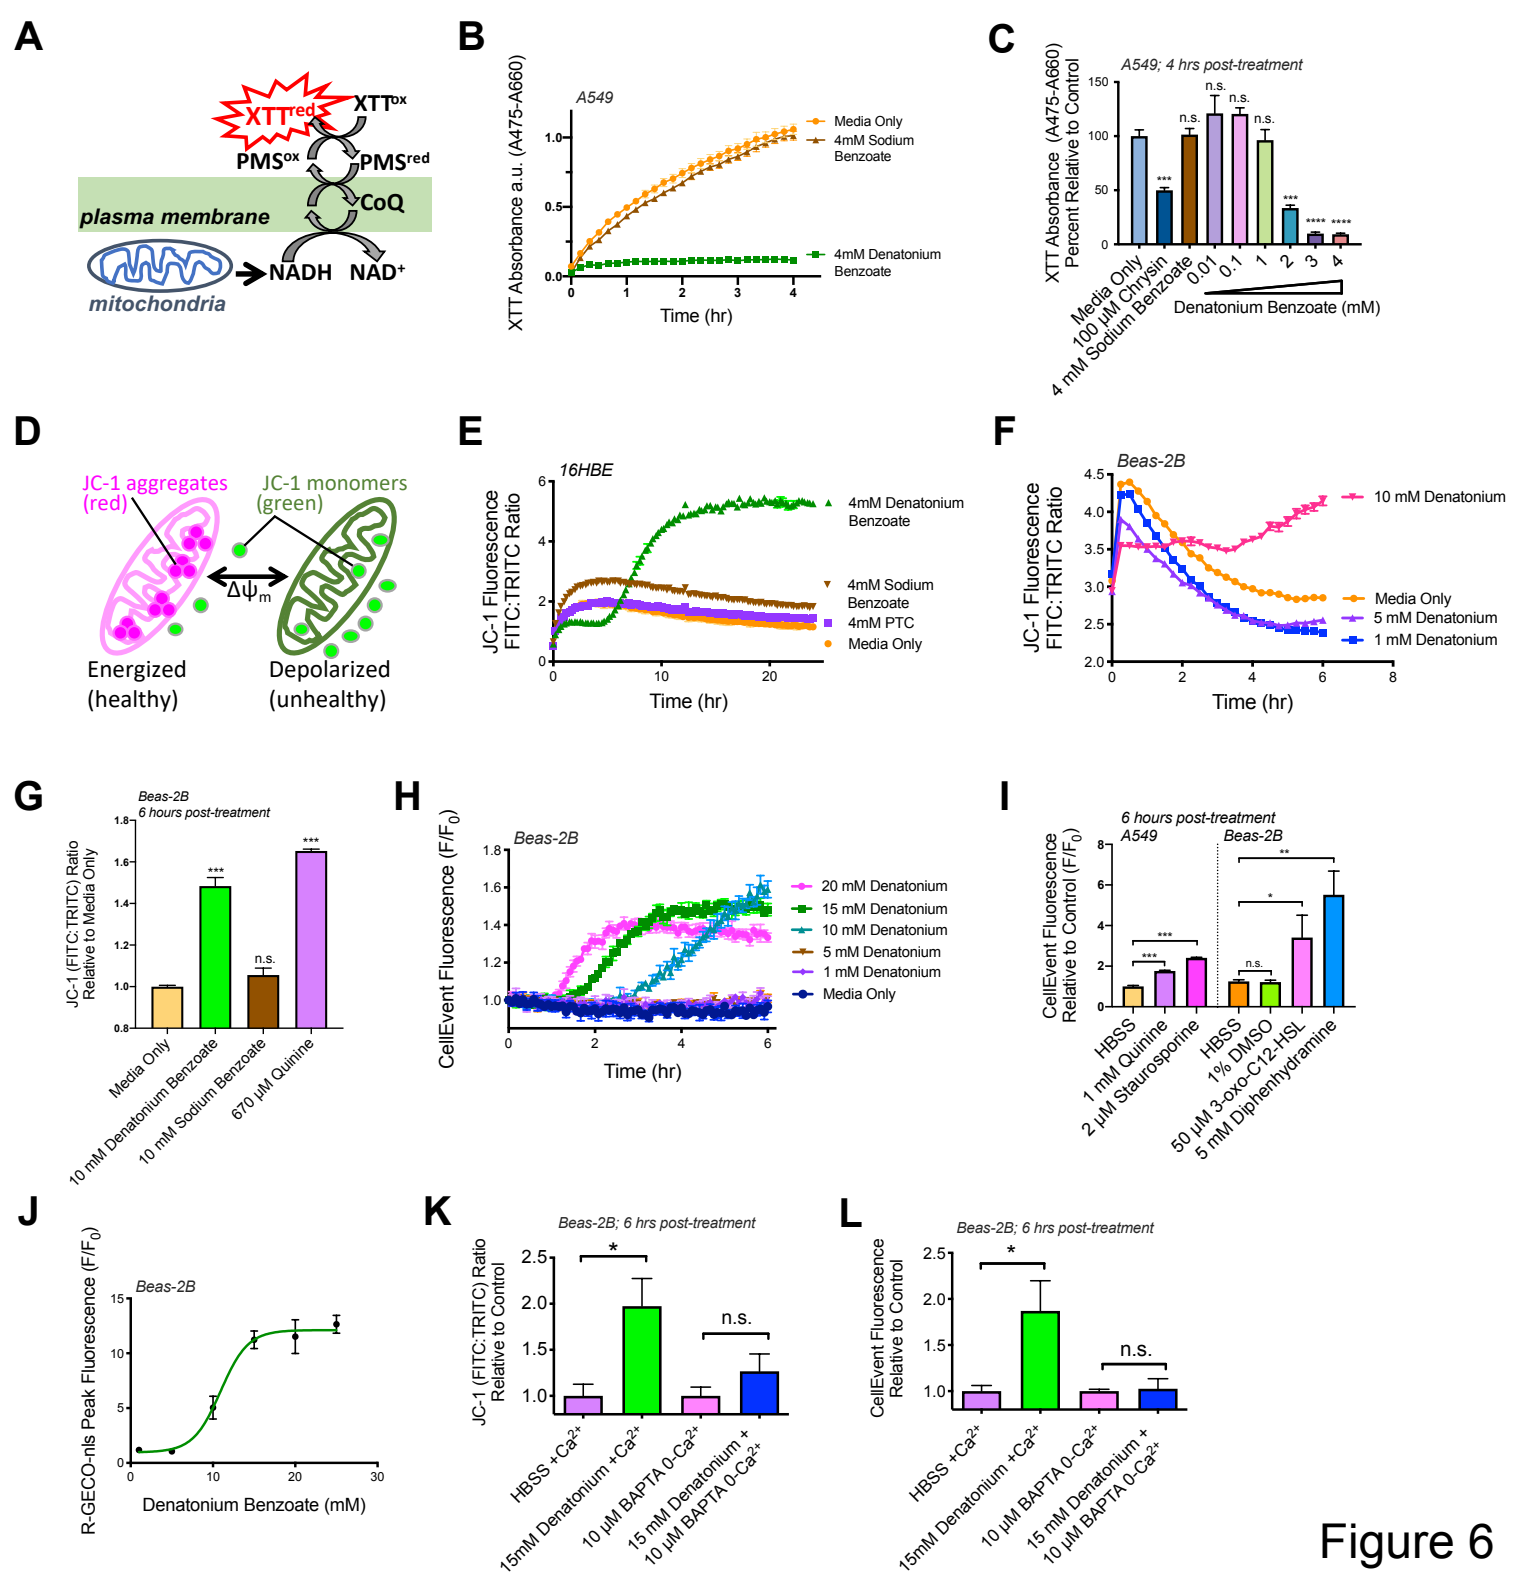

Figure 6

**A**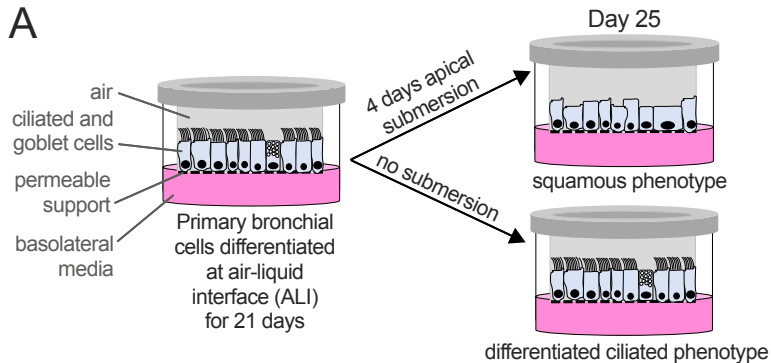**C**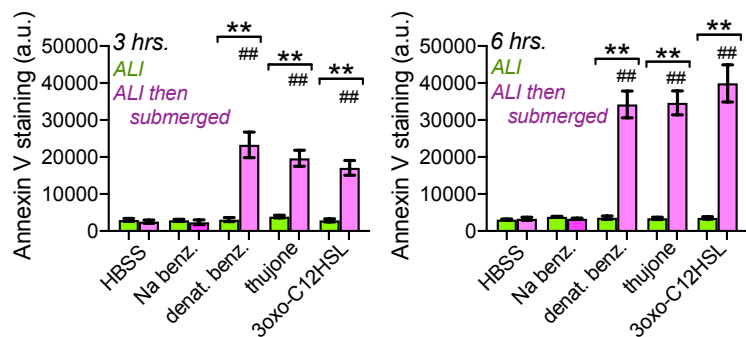**D**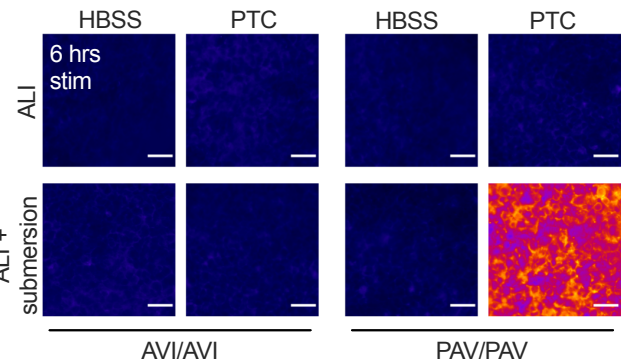**E**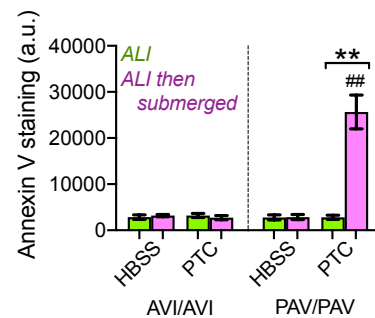**F**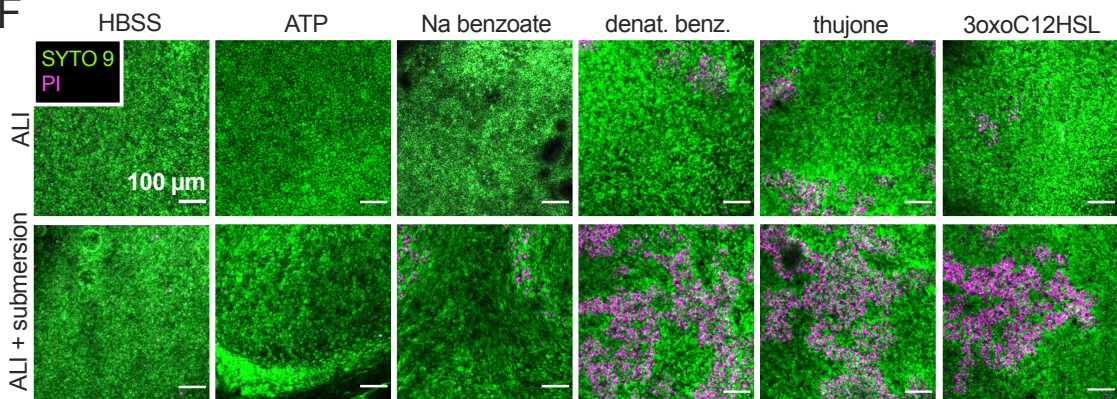**B**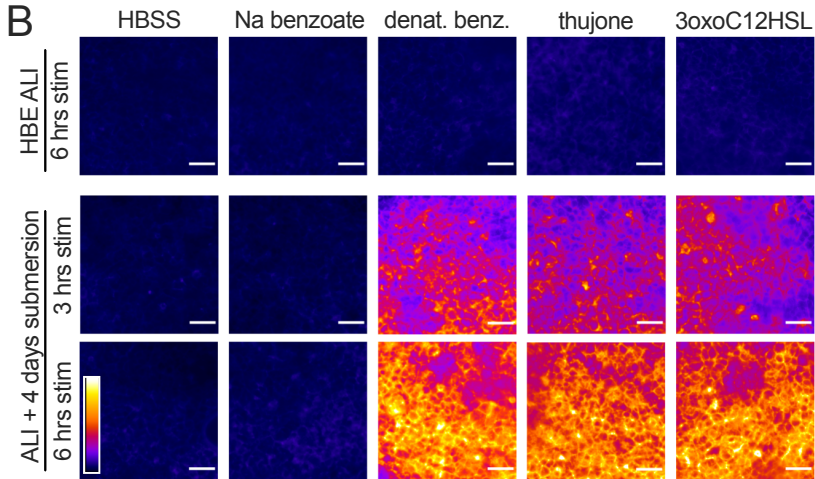**G**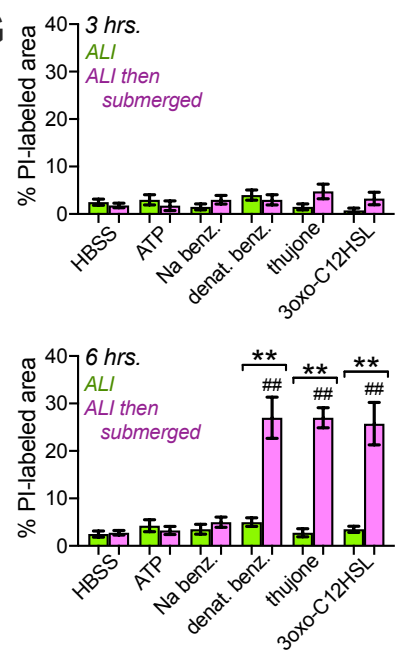

Figure 7
